# Supplementary material
Source: PubMed Central journal article supplement (PMC3262910)
Supplement: NIHMS340279-supplement-1.pdf [file NIHMS340279-supplement-1.pdf]

**B–helper neutrophils stimulate immunoglobulin diversification and production in the marginal zone of the spleen**

**Irene Puga, Montserrat Cols, Carolina M. Barra, Bing He, Linda Cassis, Maurizio Gentile, Laura Comerma, Alejo Chorny, Meimei Shan, Weifeng Xu, Giuliana Magri, Daniel M. Knowles, Wayne Tam, April Chiu, James B Bussel, Sergi Serrano, José Antonio Lorente, Beatriz Bellosillo, Josep Lloreta, Nuria Juanpere, Francesc Alameda, Teresa Baró, Cristina Díaz de Heredia, Núria Torán, Albert Català, Montserrat Torreadell, Claudia Fortuny, Victoria Cusí, Carmen Carreras, George A. Diaz, J. Magarian Blander, Claire-Michele Farber, Guido Silvestri, Charlotte Cunningham-Rundles, Michaela Calvillo, Carlo Dufour, Lucia Notarangelo, Vassilios Lougaris, Alessandro Plebani, Jean-Laurent Casanova, Stephanie C. Ganal, Andreas Diefenbach, Juan Ignacio Aróstegui, Manel Juan, Jordi Yagüe, Nizar Mahlaoui, Jean Donadieu, Kang Chen & Andrea Cerutti**

**SUPPLEMENTARY TABLES S1 – S6**

**SUPPLEMENTARY FIGURES AND LEGENDS S1 – S22**

**SUPPLEMENTARY MOVIE LEGENDS M1 and M2**

## SUPPLEMENTARY TABLES

Table S1. Patients with neutrophil disorders.

| Sex | Age   | Immunodeficiency           | Gene mutated  | (mg/dL)          |        |       |
|-----|-------|----------------------------|---------------|------------------|--------|-------|
|     |       |                            |               | IgA <sup>¶</sup> | IgG    | IgM   |
| M   | 11 yr | SCN <sup>#</sup>           | Unknown       | 378,3            | 418,1  | 117,3 |
| F   | 11 yr | SCN                        | Unknown       | 184,1            | 1179,5 | 273,1 |
| F   | 14 yr | SCN                        | Unknown       | 116,2            | 691,5  | 166,2 |
| F   | 15 yr | SCN                        | Unknown       | 174,3            | 961,9  | 158,2 |
| F   | 16 yr | SCN                        | Unknown       | 204,7            | 889,2  | 220,4 |
| F   | 19 yr | SCN                        | Unknown       | 11,3             | 187,2  | 42,4  |
| F   | 32 yr | SCN                        | Unknown       | 186,8            | 479,2  | 167,3 |
| F   | 35 yr | SCN                        | Unknown       | 388,4            | 1770,3 | 242,6 |
| F   | 36 yr | SCN                        | Unknown       | 273,4            | 479,2  | 108,1 |
| F   | 41 yr | SCN                        | Unknown       | N/A*             | N/A    | N/A   |
| M   | 49 yr | SCN                        | Unknown       | 246,5            | 604,2  | 225,0 |
| M   | 50 yr | SCN                        | Unknown       | 326,4            | 1744,1 | 153,2 |
| M   | 17 yr | SCN                        | <i>ELANE</i>  | 467,9            | 2063,1 | 197,1 |
| M   | 10 yr | SCN                        | <i>ELANE</i>  | N/A              | N/A    | N/A   |
| M   | 12 yr | SCN                        | <i>WAS</i>    | 405,6            | 1712,1 | 245,3 |
| M   | 14 yr | SBDS <sup>##</sup>         | <i>SBDSP1</i> | 305,7            | 1302,1 | 119,2 |
| F   | 19 yr | SBDS <sup>##</sup>         | <i>SBDSP1</i> | 65,1             | 95,3   | 88,2  |
| F   | N/A   | WHIM <sup>§</sup> syndrome | <i>CXCR4</i>  | 188,7            | 1267,2 | 68,0  |
| F   | N/A   | WHIM syndrome              | <i>CXCR4</i>  | 70,2             | 176,8  | 60,4  |
| F   | 24 yr | CN <sup>¥</sup>            | <i>ELANE</i>  | 452,8            | 1848,8 | 265,9 |
| F   | 27 yr | CGD <sup>□</sup>           | <i>CYBB</i>   | 281,6            | 819,4  | 262,1 |
| F   | 12 yr | LAD-1 <sup>°</sup>         | <i>ITGB2</i>  | 340,5            | 1159,6 | 175,0 |

<sup>¶</sup>Normal range IgA [142-262]; IgG [920-1480]; IgM [88-184].

<sup>#</sup>SCN, severe congenital neutropenia (< 500 neutrophils/ $\mu$ l).

\*N/A, not available.

<sup>##</sup>SBDS, Shwachman-Bodian-Diamond syndrome (< 500 neutrophils/ $\mu$ l).

<sup>§</sup>WHIM, warts-hypogammaglobulinemia-infections-myelokathexis syndrome (< 500 neutrophils/ $\mu$ l).

<sup>¥</sup>CN, cyclic neutropenia (< 1000 neutrophils/ $\mu$ l).

<sup>□</sup>CGD, chronic granulomatous disease (> 1500 neutrophils/ $\mu$ l).

<sup>°</sup>LAD-1, leukocyte adhesion deficiency-1 (> 1500 neutrophils/ $\mu$ l).

**Table S2. Fresh tissue samples.**

| <b>SAMPLE</b>              | <b>SEX</b> | <b>AGE</b> | <b>CONDITION</b>        |
|----------------------------|------------|------------|-------------------------|
| Spleen                     | M          | 4 yr       | Organ donor             |
| Spleen                     | M          | 22 yr      | Organ donor             |
| Spleen                     | F          | 51 yr      | Organ donor             |
| Spleen                     | M          | 56 yr      | Organ donor             |
| Spleen                     | F          | 58 yr      | Organ donor             |
| Spleen                     | F          | 62 yr      | Organ donor             |
| Spleen                     | F          | 68 yr      | Organ donor             |
| Spleen                     | F          | 68 yr      | Organ donor             |
| Spleen                     | F          | 68 yr      | Organ donor             |
| Spleen                     | M          | 74 yr      | Organ donor             |
| Spleen                     | F          | 78 yr      | Organ donor             |
| Spleen                     | F          | 86 yr      | Organ donor             |
| Spleen                     | F          | 71 yr      | Organ donor             |
| Spleen                     | M          | 12 yr      | Trauma                  |
| Spleen                     | M          | 22 yr      | Trauma                  |
| Spleen                     | M          | 22 yr      | Trauma                  |
| Spleen                     | M          | 34 yr      | Trauma                  |
| Spleen                     | F          | 35 yr      | Trauma                  |
| Spleen                     | F          | 43 yr      | Trauma                  |
| Spleen                     | M          | 44 yr      | Trauma                  |
| Spleen                     | M          | 48 yr      | Trauma                  |
| Spleen                     | F          | 55 yr      | Trauma                  |
| Spleen                     | F          | 57 yr      | Trauma                  |
| Spleen                     | F          | 59 yr      | Trauma                  |
| Spleen                     | N/A*       | N/A        | SCN <sup>#</sup>        |
| Axilar lymph node          | F          | 49 yr      | Breast cancer           |
| Pelvic lymph node          | F          | 73 yr      | Squamous cell carcinoma |
| Retroperitoneal lymph node | F          | 68 yr      | Organ donor             |
| Mesenteric lymph node      | N/A        | N/A        | Colon carcinoma         |
| Mesenteric lymph node      | N/A        | N/A        | Colon carcinoma         |
| Tonsils                    | F          | 7 yr       | Follicular hyperplasia  |
| Tonsils                    | F          | 9 yr       | Follicular hyperplasia  |

\*Not available.

<sup>#</sup>SCN, severe congenital neutropenia

**Table S3. Frozen and paraffin-embedded tissue samples.**

| <b>SAMPLE</b>         | <b>SEX</b> | <b>AGE</b> | <b>CONDITION</b>                    |
|-----------------------|------------|------------|-------------------------------------|
| Fetal spleen          |            | 12 wk      | Induced abortion                    |
| Fetal spleen          |            | 17,5 wk    | Spontaneous abortion                |
| Fetal spleen          |            | 19 wk      | Spontaneous abortion                |
| Fetal spleen          |            | 20 wk      | Induced abortion                    |
| Fetal spleen          |            | 21 wk      | Induced abortion                    |
| Fetal spleen          |            | 21 wk      | Induced abortion                    |
| Fetal spleen          |            | 21 wk      | Induced abortion                    |
| Fetal spleen          |            | 22 wk      | Induced abortion                    |
| Fetal spleen          |            | 22 wk      | Spontaneous abortion                |
| Fetal spleen          |            | 22 wk      | Induced abortion                    |
| Fetal spleen          |            | 32 wk      | Spontaneous abortion                |
| Fetal spleen          |            | 41 wk      | Spontaneous abortion                |
| Neonatal spleen       | M          | 2 d        | Congenital cardiopathy              |
| Neonatal spleen       | F          | 10 d       | Diaphragmatic hernia                |
| Neonatal spleen       | M          | 30 d       | Microangiopathy                     |
| Neonatal spleen       | M          | 6 mo       | Cardiopathy                         |
| Spleen                | M          | 4 yr       | Trauma                              |
| Spleen                | M          | 6 yr       | Brain aneurysm                      |
| Spleen                | F          | 14 yr      | N/A*                                |
| Spleen                | F          | 35 yr      | Trauma                              |
| Spleen                | M          | 70 yr      | Trauma                              |
| Spleen                | M          | 58 yr      | Colon cancer                        |
| Spleen                | N/A        | N/A        | Bleeding disorder                   |
| Spleen                | N/A        | N/A        | Systemic lupus erythematosus        |
| Spleen                | N/A        | N/A        | Systemic lupus erythematosus        |
| Spleen                | N/A        | N/A        | HIV infection                       |
| Spleen                | N/A        | N/A        | Hereditary spherocytosis            |
| Spleen                | N/A        | N/A        | Severe congenital neutropenia       |
| Spleen                | N/A        | N/A        | Hyper-IgD syndrome                  |
| Spleen                | F          | 31 yr      | Idiopathic thrombocytopenic purpura |
| Spleen                | M          | 72 yr      | Idiopathic thrombocytopenic purpura |
| Intestine             | M          | 83 yr      | Colon cancer                        |
| Intestine             | M          | 67 yr      | Colon cancer                        |
| Intestine             | M          | 84 yr      | Colon cancer                        |
| Mesenteric lymph node | M          | 74 yr      | Colon cancer                        |
| Mesenteric lymph node | M          | 49 yr      | Colon cancer                        |
| Cervical lymph node   | F          | 30 yr      | Thyroid cancer                      |
| Cervical lymph node   | F          | 30 yr      | Thyroid cancer                      |
| Cervical lymph node   | M          | 54 yr      | Laryngeal cancer                    |
| Axillar lymph node    | F          | 49 yr      | Breast cancer                       |
| Pelvic lymph node     | F          | 68 yr      | Prostate cancer                     |
| Pelvic lymph node     | F          | 73 yr      | Prostate cancer                     |
| Tonsils               | F          | 9 yr       | Follicular hyperplasia              |
| Tonsils               | M          | 6 yr       | Follicular hyperplasia              |

\*Not available.

**Table S4. Antibodies used in flow cytometry and immunofluorescence.****a. Antibodies to human antigens.**

| <b>Antigen</b> | <b>Label</b> | <b>Isotype</b>               | <b>Clone<br/>(if monoclonal)</b> | <b>Manufacturer</b>   | <b>Use</b>          |
|----------------|--------------|------------------------------|----------------------------------|-----------------------|---------------------|
| AID            |              | Rat IgG2b                    | EK2 5G9                          | Cell Signaling        | <sup>1</sup> IF     |
| AID            |              | Goat IgG                     | -                                | Santa Cruz            |                     |
| APRIL          |              | Rabbit IgG                   | ED2                              | Prosci                | <sup>#</sup> FC /IF |
| BAFF           |              | Mouse IgG1                   | 1D6                              | eBioscience           | IF                  |
| BAFF           | PE           | Mouse IgG1                   | 1D6                              | eBioscience           |                     |
| CD8            | FITC         | Mouse IgG1                   | RFT-8                            | Southern Biotech      | FC                  |
| CD11b          | PE           | Mouse-IgG2a                  | D12                              | BD Biosciences        | FC                  |
| CD11c          | PE           | Mouse IgG1                   | B-ly6                            | BD Biosciences        | IF                  |
| CD15           | FITC         | Mouse IgM                    | 28                               | Southern Biotech      | FC                  |
| CD15           | Biotin       | Mouse IgG1                   | W6D3                             | Biologend             |                     |
| CD15           |              | Mouse IgM                    | 28                               | Southern Biotech      | IF                  |
| CD16           | Biotin       | Mouse IgG1                   | 3G8                              | BD Biosciences        | FC                  |
| CD16           | PE           | Mouse IgG1                   | 3G8                              | BD Biosciences        | FC                  |
| CD16           | Alexa647     | Mouse IgG1                   | 3G8                              | BD Biosciences        |                     |
| CD19           | APC          | Mouse IgG1                   | H1B19                            | BD Biosciences        |                     |
| CD19           | PE-Cy7       | Mouse IgG1                   | H1B19                            | Biologend             | FC                  |
| CD20           | FITC         | Mouse IgG1                   | L27                              | BD Biosciences        | *IHC                |
| CD24           | PE           | Mouse IgG2a                  | ML5                              | BD Biosciences        | FC                  |
| CD27           | PE           | Mouse IgG1                   | M-T271                           | Ancell                | FC                  |
| CD31           | PE           | Mouse IgG1                   | TDR31.3                          | Ancell                |                     |
| CD31           | Alexa 647    | Mouse IgG2a                  | M89D3                            | BD Biosciences        |                     |
| CD31           |              | Mouse IgG1                   | M0823                            | Dako                  | IF                  |
| CD38           | PE           | Mouse IgG1                   | HIT2                             | BD Biosciences        | FC                  |
| CD54           | PE           | Mouse IgG1                   | HCD54                            | Biologend             | FC                  |
| CD62L          | PE-Cy7       | Mouse IgG1                   | DREG-56                          | eBioscience           | FC                  |
| CD62P          | PE           | Mouse IgG1                   | AK4                              | Biologend             | FC                  |
| CD68           |              | Mouse IgG1                   | KP1                              | Dako                  | IF                  |
| CD86           | PE           | Mouse IgG2b                  | IT2.2 BD                         | Biosciences           | FC                  |
| CD95           | PE           | Mouse IgG1                   | DX2                              | BD Biosciences        | FC                  |
| CD102          | PE           | Mouse IgG1                   | CBR-IC2/2                        | Biologend             | FC                  |
| CD154 (CD40L)  | PE           | Mouse IgG1                   | 24-31                            | Ancell                | FC                  |
| CD163          |              | Mouse IgG1                   | 10D6                             | Thermo Scientific     | IF                  |
| CD206 (MR)     |              | Mouse IgG1                   | 19.2                             | BD Biosciences        | IF                  |
| CD206 (MR)     | FITC         | Mouse IgG1                   | 19.2                             | BD Biosciences        |                     |
| CEACAM-1       |              | Mouse IgG                    | -                                | M. López-Botet (IMIM) | IF                  |
| IgA            | Biotin       | Goat IgG                     | -                                | Southern Biotech      | IF                  |
| IgD            | FITC         | Goat IgG F(ab') <sub>2</sub> | -                                | Southern Biotech      | FC/IF               |

|                     |        |                              |           |                  |        |
|---------------------|--------|------------------------------|-----------|------------------|--------|
| IgD                 | Biotin | Goat IgG F(ab') <sub>2</sub> | -         | Southern Biotech | IF     |
| IL-10               | PE     | Mouse IgG1                   | JES3-19F1 | Biologend        | IF     |
| LPS                 |        | Mouse IgG2b                  | 2D7/1     | Abcam            | IHC/IF |
| MHC-I               | PE     | Mouse IgG2a                  | 3F10      | Ancell           | FC     |
| MHC-II              | PE     | Mouse IgG1                   | TDR31.3   | Ancell           | FC     |
| Myeloperoxidase     | FITC   | Mouse IgG1                   | F0714     | Dako             | IF     |
| Neutrophil Elastase |        | Mouse IgG1                   | NP57      | Dako             | IF     |
| Neutrophil Elastase |        | Rabbit IgG                   | -         | Abcam            | IF     |
| Pax-5               |        | Rabbit IgG                   | -         | Neomarkers       | IF     |
| vWF                 |        | Rabbit IgG                   | -         | Dako             | IF     |

### b. Antibodies to mouse antigens.

| Antigen | Label  | Isotype     | Clone (if monoclonal) | Manufacturer   | Use             |
|---------|--------|-------------|-----------------------|----------------|-----------------|
| IgD     | FITC   | Rat IgG2a   | 11-26c.2a             | BD Biosciences | <sup>¶</sup> IF |
| IgD     | Biotin | Mouse-IgG2b | AMS 9.1               | BD Biosciences | IF              |
| MOMA-1  | Biotin | Rat IgG2a   | MOMA-1                | Abcam          | IF              |
| Ly6G    | Cy5    | Rat IgG2b   | RB6-8C5               | Abcam          | IF              |
| Ly6G    | APC    | Rat IgG2b   | RB6-8C5               | eBioscience    | <sup>#</sup> FC |
| CD11b   | PE     | Rat IgG2b   | M1/70                 | eBioscience    | FC              |

<sup>¶</sup>IF, immunofluorescence.

<sup>#</sup>FC, flow cytometry.

\*IHC, immunohistochemistry.

**Table S5. Coating strategy for ELISA.**

| <b>Purified antigens</b>                             | <b>Source</b>                 | <b>Company</b>    | <b>Antigen concentration or dilution</b> |
|------------------------------------------------------|-------------------------------|-------------------|------------------------------------------|
| LPS                                                  | <i>Escherichia coli</i>       | InvivoGen         | 10 µg/ml                                 |
| LPS                                                  | <i>Pseudomonas aeruginosa</i> | Sigma             | 1 µg/ml                                  |
| CPS (serotypes 9N, 14, 19F, 23F)                     | <i>Pneumococcus</i>           | ATCC <sup>s</sup> | 10 ng/ml                                 |
| Gal-α-1,3-Gal                                        |                               | Dextra Lab        | 0,5 µg/ml                                |
| LTA                                                  | <i>Bacillus subtilis</i>      | Sigma             | 1 µg/ml                                  |
| PGN                                                  | <i>Bacillus subtilis</i>      | Sigma             | 1 µg/ml                                  |
| Tetanus toxin                                        | <i>Clostridium tetani</i>     | Sigma             | 0.1 µg/ml                                |
| <b>Whole Bacteria</b>                                |                               |                   |                                          |
| <i>Escherichia coli</i>                              |                               | Invitrogen        | 1:1000*                                  |
| <i>Salmonella typhimurium</i>                        |                               | G. Dougar         | 1:1000                                   |
| <i>Staphylococcus aureus</i>                         |                               | ATCC              | 1:1000                                   |
| <i>Haemophilus influenzae</i> type-b                 |                               | ATCC              | 1:1000                                   |
| <i>Lactobacillus plantarum</i>                       |                               | ATCC              | 1:1000                                   |
| <b>Vaccines</b>                                      |                               |                   |                                          |
| Anatoxal Tedi (TT <sup>#</sup> + DT <sup>¶</sup> )   |                               | Berna Biotech     | 1:1000                                   |
| Menjugate Kit (Meningococcal CPS conjugated with DT) |                               | Novartis          | 1:1000                                   |

<sup>s</sup>ATCC, American Type Culture Collection.

\*Volume:volume.

<sup>#</sup>TT, tetanus toxin.

<sup>¶</sup>DT, diphtheria toxin.

**Table S6. Primers used in RT-PCR and qRT-PCR.**

| Target gene    |    | Primer sequence           |
|----------------|----|---------------------------|
| <i>ACTB</i>    | S  | GGATGCAGAAGGAGATCACT      |
|                | AS | CGATCCACACGGAGTACTTG      |
| <i>AICDA</i>   | S  | AGAGGCGTGACAGTGCTACA      |
|                | AS | TGTAGCGGAGGAAGAGCAAT      |
| <i>ALDH1A1</i> | S  | ATGGCATGATTCAGTGAGTG      |
|                | AS | GCAGACGATCTCTTTTCGATT     |
| <i>APAF1</i>   | S  | GTCTGCTGATGGTGCAAG GA     |
|                | AS | GATGGCCCGTGTGGATTTC       |
| <i>ARG1</i>    | S  | ATGGGGACCTGCCCTTTGCT      |
|                | AS | CTTCTGCCACCTTGCCAGCC      |
| <i>BAD</i>     | S  | AGCCAACCAGCAGCAGCCATCAT   |
|                | AS | CTCCCCCATCCCTTCGTCGTC     |
| <i>BAK1</i>    | S  | AGCAGCACCATGGGGCAGGT      |
|                | AS | CTCTCAAACAGGCTGGTGGCAATC  |
| <i>BAX</i>     | S  | AGAGGATGATTGCCGCCGT       |
|                | AS | CAACCACCCTGGTCTTGGATC     |
| <i>BCL2</i>    | S  | CCTCCCTGGCCTGAAGAAGA      |
|                | AS | TGTCCTTCGGCGTGGAAATC      |
| <i>BCL2L1</i>  | S  | GGAAAGCGTAGACAAGGAGATGC   |
|                | AS | TCCACAAAAGTATCCCAGCCG     |
| <i>BCL2L11</i> | S  | ATGAGAAGATCCTCCCTGCT      |
|                | AS | AATGCATTCTCCACACCAGG      |
| <i>BCL10</i>   | S  | GAACTCCTGGACTCAAGCAA      |
|                | AS | GGTGGCTCGTGTCTGTAATC      |
| <i>CARD6</i>   | S  | GATGACCCAGAGCACGTTGGA     |
|                | AS | TCCTCCTCCAATGAAAGGCTGGT   |
| <i>CARD8</i>   | S  | CTGCCGAGACGGGACAGTGGA     |
|                | AS | ATTTGTCACACAGGCCTCAGCCT   |
| <i>CASP1</i>   | S  | TCTTCCTTTCCAGCTCCTCAGGCA  |
|                | AS | TGAGAGCAAGACGTGTGCGGCT    |
| <i>CASP3</i>   | S  | GCAGCAAACCTCAGGGAAAC      |
|                | AS | TGTCGGCATACTGTTTCAGCA     |
| <i>CASP5</i>   | S  | CCTGCAAGGAATGGGGCTCACTAT  |
|                | AS | CTCTGCAGGCCTGGACAATGATGAC |
| <i>CCL2</i>    | S  | CCCCAAGCAGAAGTGGGTTC      |
|                | AS | TGTCTGGGGAAAGCTAGGGG      |
| <i>CCL3</i>    | S  | GACTTCAGAAGGACACGGGC      |
|                | AS | TGAGCAGGTGACGGAATGTG      |
| <i>CCL4</i>    | S  | CTGGGTCCAGGAGTACGTGT      |
|                | AS | AGGAACTGCGGAGAGGAGTC      |
| <i>CCL5</i>    | S  | TGAGCTCTGGCTTTGCCTTG      |
|                | AS | TCCTCCCCTCCTTGCCTCTA      |
| <i>CCL19</i>   | S  | CGCCGCAGCAGTTAACCTAT      |
|                | AS | CCTTCCTTCTGGTCCTCGGT      |
| <i>CCL20</i>   | S  | GAACCTTGCTGGGGTTGGAG      |
|                | AS | TGGACAAGTCCAGTGAGGCA      |
| <i>CCL21</i>   | S  | CTGGTTCTGGCCTTTGGCAT      |



|               |    |                          |
|---------------|----|--------------------------|
|               | AS | AAGCTTGGTTCCTGCTTCCG     |
| <i>CD40LG</i> | S  | GCTTTGAAATGCAAAAAGGTGAT  |
|               | AS | TTGTTTTACTGCTGGCCTCACTT  |
| <i>CXCL1</i>  | S  | GCGCCCAAACCGAAGTCATA     |
|               | AS | TCAGGAACAGCCACCAGTGA     |
| <i>CXCL2</i>  | S  | AGAAAGCTTGTCTCAACCCCG    |
|               | AS | TCCTTCAGGAACAGCCACCA     |
| <i>CXCL3</i>  | S  | GCGCCCAAACCGAAGTCATA     |
|               | AS | TCAGTTGGTGTCTCCCCTTGT    |
| <i>CXCL5</i>  | S  | TGCTGTGTTGAGAGAGCTGC     |
|               | AS | TTGGAGCACTGTGGGCCTAT     |
| <i>CXCL10</i> | S  | TGAGCCTACAGCAGAGGAA      |
|               | AS | TACTCCTTGAATGCCACTTAGA   |
| <i>CXCL12</i> | S  | ACCGCGCTCTGCCTCA         |
|               | AS | CATGGCTTTCGAAGAATCGG     |
| <i>CXCL13</i> | S  | GCAGCCTCTCTCCAGTCCAA     |
|               | AS | TGGACACATCTACACCTCAAGCTT |
| <i>CRLF2</i>  | S  | GGGGCAAGGAGGAGCAGATTCA   |
|               | AS | GTCGTCTCGCTGCTCTGCGT     |
| <i>FAS</i>    | S  | ATGCTGGGCATCTGGACCCT     |
|               | AS | GCCATGTCCTTCATCACACAA    |
| <i>FASLG</i>  | S  | TGTGCCCAGAAGGCCTGGTC     |
|               | AS | AGGCCTGTGCTGTGGTTCCT     |
| <i>GRN</i>    | S  | AAGGAGAACGCTACCACGGA     |
|               | AS | CGGGACAGCAGTGTATGTGG     |
| <i>ELANE</i>  | S  | GCGTGGCGAATGTAAACGTC     |
|               | AS | CCGTTTTTCGAAGATGCGCTG    |
| <i>IFNA2</i>  | S  | GTGACCTACCACAAACCCACAGCC |
|               | AS | ATTCTCCTCATCTGCGCCAGGA   |
| <i>IFNG</i>   | S  | CTAATTATTCGGTAACTGACTTGA |
|               | AS | ACAGTTCAGCCATCACTTGGA    |
| <i>IDO1</i>   | S  | TGTCTGGCTGGAAAGGCAAC     |
|               | AS | CAGCAGGACGTCAAAGCACT     |
| <i>IL1B</i>   | S  | TCCCCAGCCCTTTTGTGTA      |
|               | AS | TTAGAACCAAATGTGGCCGTG    |
| <i>IL6</i>    | S  | GGTACATCCTCGACGGCATCT    |
|               | AS | GTGCCTCTTTGCTGCTTTCAC    |
| <i>IL8</i>    | S  | CCAAACCTTTCCACCC         |
|               | AS | ACTTCTCCACAACCCT         |
| <i>IL10</i>   | S  | ACCTGCCTAACATGCTTCGAG    |
|               | AS | TGTCCAGCTGATCCTTCATTTG   |
| <i>IL10RA</i> | S  | TCAGACGCTCATGGGACAGA     |
|               | AS | ATACCTCAGGAGCGCCACTT     |
| <i>IL10RB</i> | S  | ATCAGGGCAGCAAACAAGGG     |
|               | AS | TCTGGTGGCTAAGTCCAGGG     |
| <i>IL12A</i>  | S  | TTCACCACTCCCAAACCTGC     |
|               | AS | GAGGCCAGGCAACTCCCATTAG   |
| <i>IL12B</i>  | S  | GGGAACTGAAGAAAGATGTTTATG |
|               | AS | CTCTGGTCCAAGGTCC         |
| <i>IL15</i>   | S  | GTTACCCCCAGTTGCAAAGTAAC  |

|                 |    |                            |
|-----------------|----|----------------------------|
|                 | AS | TATCATGAATACTTGCATCTCCGGA  |
| <i>IL17A</i>    | S  | CCCCAGTTGATTGGAAGAAA       |
|                 | AS | GAGGACCTTTTGGGATTGGT       |
| <i>IL18</i>     | S  | CCAGTGCATTTTGCCCTCCT       |
|                 | AS | GTTTGTGCGAGAGGAAGCG        |
| <i>IL21</i>     | S  | TGTGAATGACTTGGTCCCTGAA     |
|                 | AS | CAGGAAAAAGCTGACCACTCA      |
| <i>IL22</i>     | S  | GCAGGCTTGACAAGTCCAAC       |
|                 | AS | GCCTCCTTAGCCAGCATGAA       |
| <i>MCL1</i>     | S  | GGTACCTTCGGGAGCAGGCCA      |
|                 | AS | AAGGCCGTCTCGTGGTTGC        |
| <i>MIR155HG</i> | S  | CTCTAATGGTGGCACAAA         |
|                 | AS | TGATAAAAAACAAACATGGGCTTGAC |
| <i>MPO</i>      | S  | ATCGGTACCAGCCCATGGAA       |
|                 | AS | TGACGATTCAGCTTGGCAGG       |
| <i>NLRC4</i>    | S  | TCCCCGTGCGTCATCGGTGGA      |
|                 | AS | AGTCAGCAGGGTTCTGGGCAAGG    |
| <i>NLRP3</i>    | S  | AAAGAGATGAGCCGAAGTGG       |
|                 | AS | TTCCTGGCATATCACAGTGG       |
| <i>NOS2</i>     | S  | CCCAGCACAAAGGGAGTGCGG      |
|                 | AS | AGGATGTCCTGAACATAGACCTTGGG |
| <i>PAX5</i>     | S  | TTGCTCATCAAGGTGTCAGG       |
|                 | AS | CTGATCTCCAGGCAAACAT        |
| <i>PPBP</i>     | S  | TGTATGCTGAACTCCGCTGC       |
|                 | AS | TGCAATGGGTTTCCTTCCCG       |
| <i>PRDM1</i>    | S  | GTGGTATTGTCGGGACTTTGCAG    |
|                 | AS | TCGGTTGCTTTAGACTGCTCTGTG   |
| <i>PTX3</i>     | S  | GGGACAAGCTCTTCATCATGCT     |
|                 | AS | GTCGTCCGTGGCTTGCA          |
| <i>SLPI</i>     | S  | CCTGGATCCTGTTGACACCC       |
|                 | AS | CACTTCCCAGGCTTCCTCCT       |
| <i>SOCS1</i>    | S  | CGATTACCGGCGCATCACGC       |
|                 | AS | TGTCGCGCACCAGGAAGGTG       |
| <i>SOCS3</i>    | S  | CACTCTTCAGCATCTCTGTCGGAAG  |
|                 | AS | CATAGGAGTCCAGGTGGCCGTTGAC  |
| <i>TGFB1</i>    | S  | AAGGACCTCGGCTGGAAGTGG      |
|                 | AS | CCGGGTTATGCTGGTTGTA        |
| <i>TNF</i>      | S  | CCCAGGCAGTCAGATCATCTTC     |
|                 | AS | AGCTGCCCCCTCAGCTTGA        |
| <i>TNFSF13</i>  | S  | GAAGGCAGGAGACTCTATTCCG     |
|                 | AS | CCCTTGGTGTAATGGAAGAC       |
| <i>TNFSF13B</i> | S  | ACCGCGGGACTGAAAATCT        |
|                 | AS | CACGCTTATTTCTGCTGTTCTGA    |
| <i>TSLP</i>     | S  | CCCAGGCTATTCGGAAACTCAG     |
|                 | AS | CGCCACAATCCTTGTAATTGTG     |
| <i>TLR1</i>     | S  | GGCTGGCCTGATTCTTATAAGTG    |
|                 | AS | CTCTAGGTTTGGCAATAATTCATTC  |
| <i>TLR2</i>     | S  | CAGCAGGTTTCAGGATGTCCG      |
|                 | AS | GCAGATGTTCCCTGCTGGGAG      |
| <i>TLR3</i>     | S  | TGACTGAACTCCATCTCATGTCC    |

|                             |                 |                           |
|-----------------------------|-----------------|---------------------------|
|                             | AS              | CCATTATGAGACAGATCTAATGTG  |
| <i>TLR4</i>                 | S               | CCCTGCGTGGAGGTAT          |
|                             | AS              | GCACCTGCAGTTCTGGGAAA      |
| <i>TLR6</i>                 | S               | AAGCGGAGGTTCTAGGCCAT      |
|                             | AS              | CTGCACTGAACCTGTGTGCT      |
| <i>TLR7</i>                 | S               | GCTGTGACCGAGTGGGTTTT      |
|                             | AS              | TTTTCCAGAACTGGCTGCCC      |
| <i>TLR8</i>                 | S               | TTCCTGTGAGTTATGCGCCG      |
|                             | AS              | TATTTGCCACCGTTTGGGG       |
| <i>TLR9</i>                 | S               | ACAACAACATCCACAGCCAAGTGTC |
|                             | AS              | AAGGCCAGGTAATTGTCACGGAG   |
| <i>XBPI</i>                 | S               | AGGAGTTAAGACAGCGCTTGG     |
|                             | AS              | AGAGGTGCACGTAGTCTGAGTGCTG |
| <i>I6SrRNA</i>              | S               | TGGTGTGTAATAATGTTCTCGTCAA |
|                             | AS              | TTCGTATTACCGCGGCTGCTGG    |
| <i>V<sub>H</sub>3-23</i>    | S               | GGCTGAGCTGGCTTTTTCTTGTGG  |
|                             | AS <sub>μ</sub> | GTTGCCGTTGGGGTGCTGGAC     |
|                             | AS <sub>γ</sub> | AAGACCGATGGGCCCTTGGTGG    |
| <i>intV<sub>H</sub>3-23</i> | S               | GGGGTCCCTGAGACTCTC        |
|                             | AS <sub>μ</sub> | AAGGAAGTCCTGTGCGAGGCAGC   |
|                             | AS <sub>γ</sub> | AAGACCGATGGGCCCTTGGTGG    |

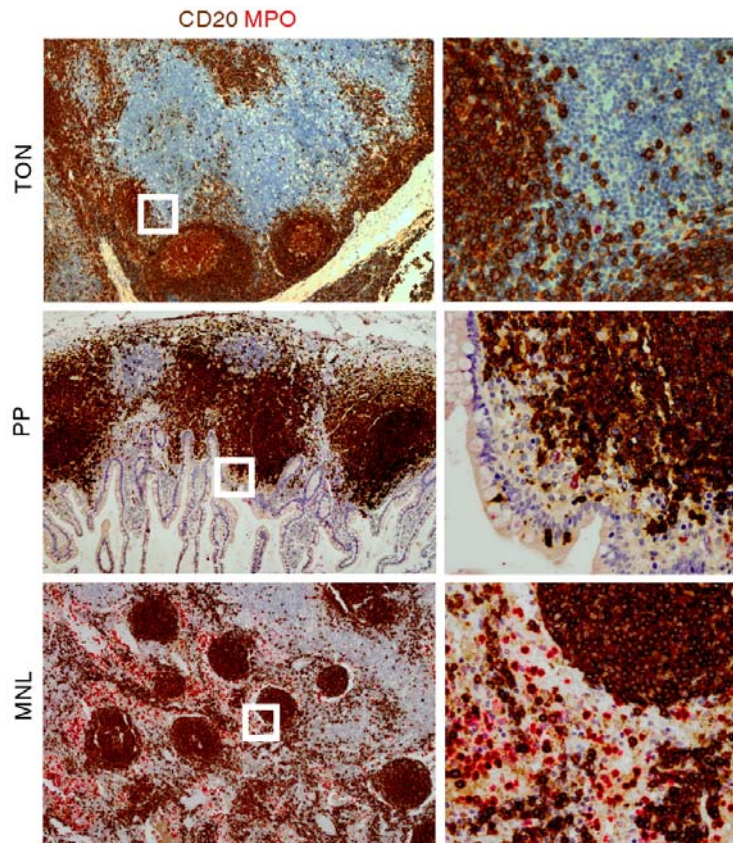

**Figure S1. Neutrophils colonize perifollicular areas of mesenteric lymph nodes.** Immunohistochemistry of tonsil (TON), intestinal Peyer's patches (PP) and mesenteric lymph node (MLN) stained for CD20 (brown) and myeloperoxidase (MPO, red). Boxes correspond to magnified right images. Original magnification, x4 (left) and x20 (right). Data are from one of five experiments with similar results.

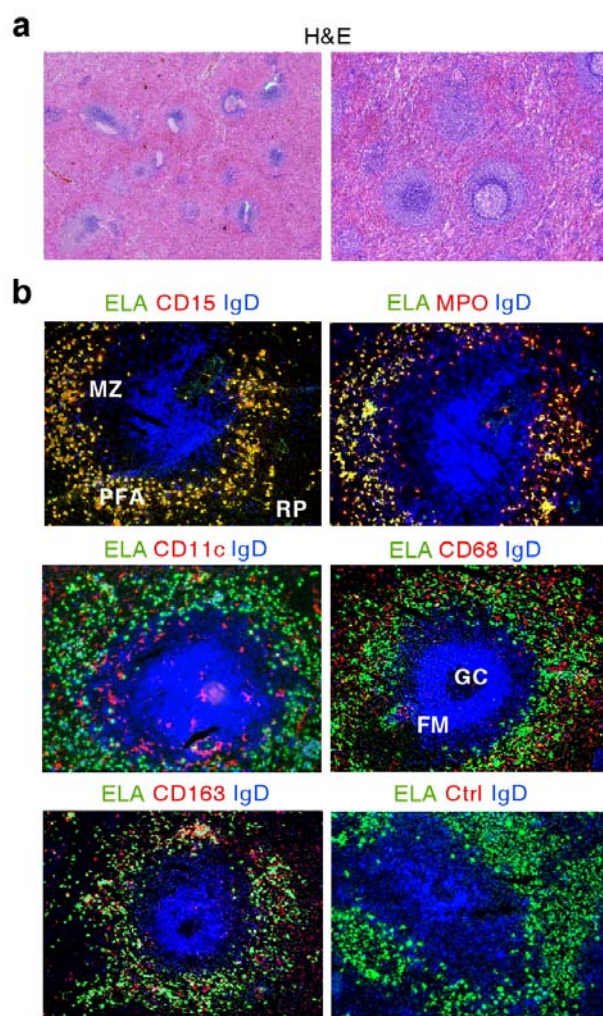

**Figure S2. Perifollicular neutrophils colonize spleens that have no histological alterations. (a)**

Light microscopy of normal spleens stained with hematoxylin and eosin (H&E). Original magnification, x4. **(b)** Immunofluorescence of spleens stained for elastase (ELA, green), CD15, myeloperoxidase (MPO), CD11c, CD68, CD163 or mouse IgG1 isotype control (red), and IgD (blue). MZ, marginal zone; PFA, perifollicular area; RP, red pulp; GC, germinal center; FM, follicular mantle. Original magnification, x10. Data are from one of five experiments with similar results.



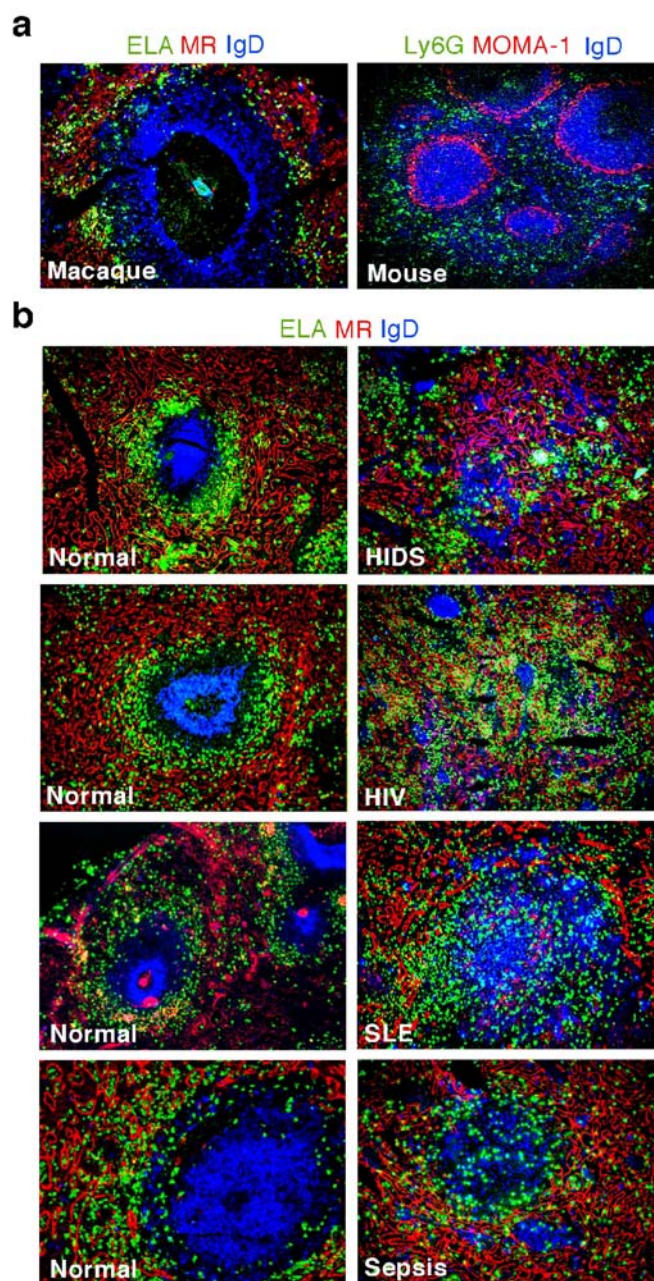

**Figure S3. Neutrophils selectively colonize splenic perifollicular areas in healthy humans, rhesus macaques and mice, but invade splenic follicular areas in patients with systemic inflammation or infection.** (a) Immunofluorescence of normal rhesus macaque spleen (left panel), and normal mouse spleen (right panel) stained for elastase (ELA) or Ly6G (green), MR or MOMA-1 (red), and IgD (blue). Original magnification, x10. (b) Immunofluorescence of spleens stained for ELA (green), MR (red), and IgD (blue) from individuals with (right panels) or without (left panels) systemic inflammation or infection, including hyper-IgD syndrome (HIDS), HIV infection, systemic lupus erythematosus (SLE), and sepsis. Original magnification, x10. Data are from one of several experiments with similar results.

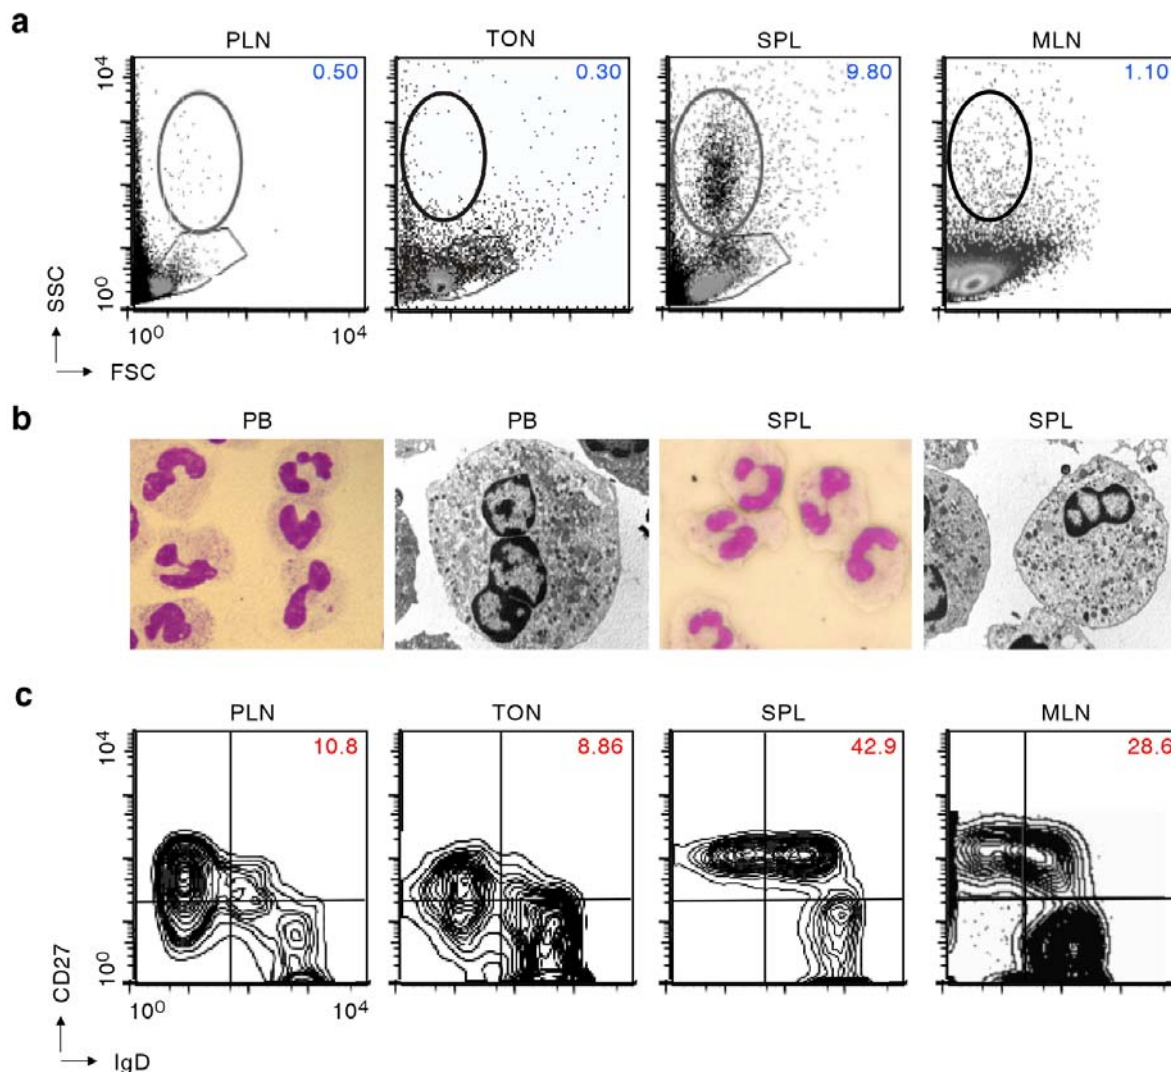

**Figure S4. Neutrophil presence in spleens and mesenteric lymph nodes correlates with a higher percentage of MZ B cells.** (a) Flow cytometry of neutrophils from peripheral lymph node (PLN), tonsil (TON), spleen (SPL) and mesenteric lymph node (MLN) cells. Oval gate includes cells with size (forward scatter, FSC) and intracellular complexity (side scatter, SSC) compatible with those of neutrophils. Numbers indicate percentage of neutrophils. (b) Light microscopy (first and third panels from left) and transmission electron microscopy (second and fourth panels from left) of neutrophils from peripheral blood (PB) and spleen (SPL) of healthy donors. Original magnification, x63 (Giemsa) and x790 (electron microscopy). (c) Flow cytometry of IgD and CD27 on CD19-gated B cells from PLN, TON, SPL, MLN. Data are from one of five experiments with similar results.

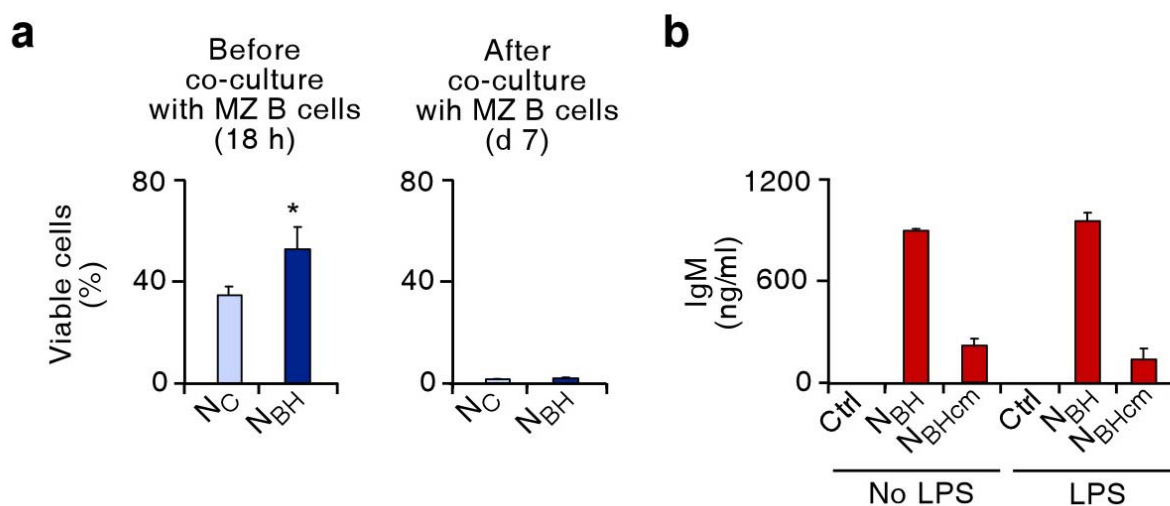

**Figure S5. N<sub>BH</sub> cells show better short-term survival but equivalent long-term survival as compared to N<sub>C</sub> cells and activate MZ B cells via both contact-dependent and contact-independent mechanisms.** (a) Flow cytometry of viable annexin V-negative propidium iodide-negative N<sub>C</sub> and N<sub>BH</sub> cells after 18 h of culture with medium alone (left panel) or after co-culture with MZ B cells for 7d (right panel). (b) ELISA of IgM from splenic MZ B cells cultured with N<sub>BH</sub> or N<sub>BH</sub> conditioned medium (N<sub>BHcm</sub>). N<sub>BH</sub> cells were primed with medium or LPS. Error bars, s.e.m.; \* P < 0.05 (one-tailed unpaired Student's t-test). Data are from one of three experiments with similar results.



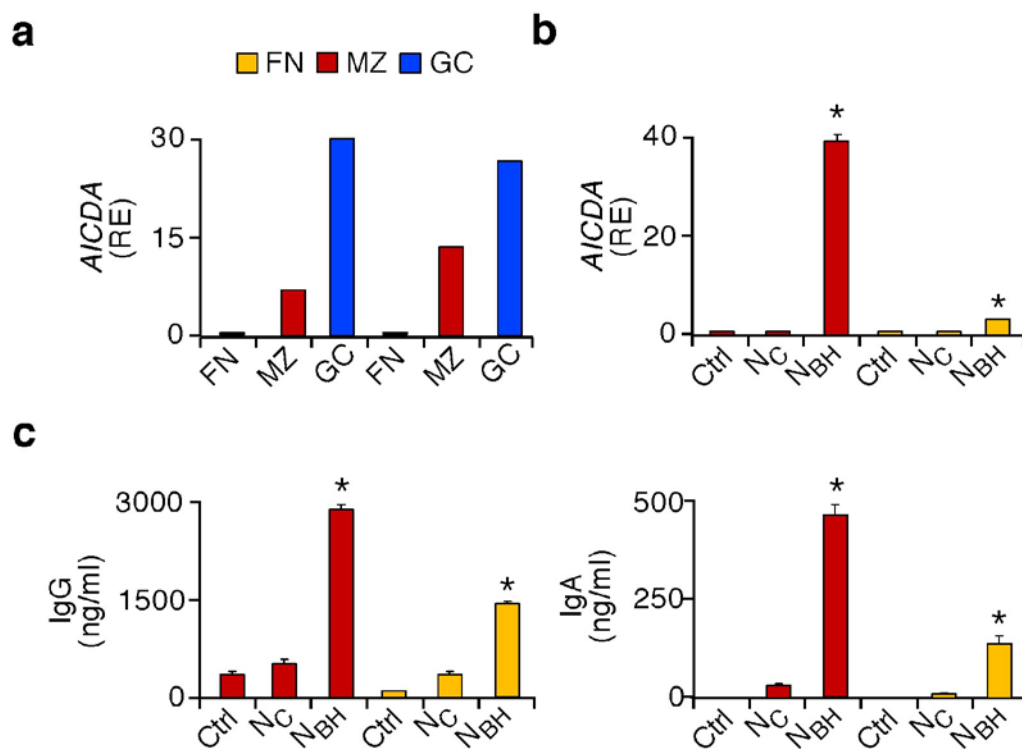

**Figure S6. N<sub>BH</sub> but not N<sub>C</sub> cells induce more AID and more IgG and IgA in MZ than FN B cells.** (a) qRT-PCR of *AICDA* mRNA (encoding AID) from splenic follicular naïve (FN), MZ and germinal center (GC) B cells isolated from two healthy donors. Results are normalized to *ACTB* mRNA (encoding  $\beta$ -actin) and are presented as relative expression (RE) compared with that of FN B cells. (b) qRT-PCR of *AICDA* mRNA from splenic MZ and FN B cells cultured for 2 d with medium (Ctrl), N<sub>C</sub> cells or N<sub>BH</sub> cells. Results are normalized to *PAX5* mRNA (encoding the B cell protein Pax5) and are presented as RE compared with that of FN B cells or MZ B cells incubated with medium alone. (c) IgG and IgA from splenic MZ and FN B cells cultured as in a for 4 d. Error bars, s.e.m.; \*  $P < 0.005$  (one-tailed unpaired Student's t-test). Data are from one of five experiments with similar results (a) or summarize three independent experiments (b,c).

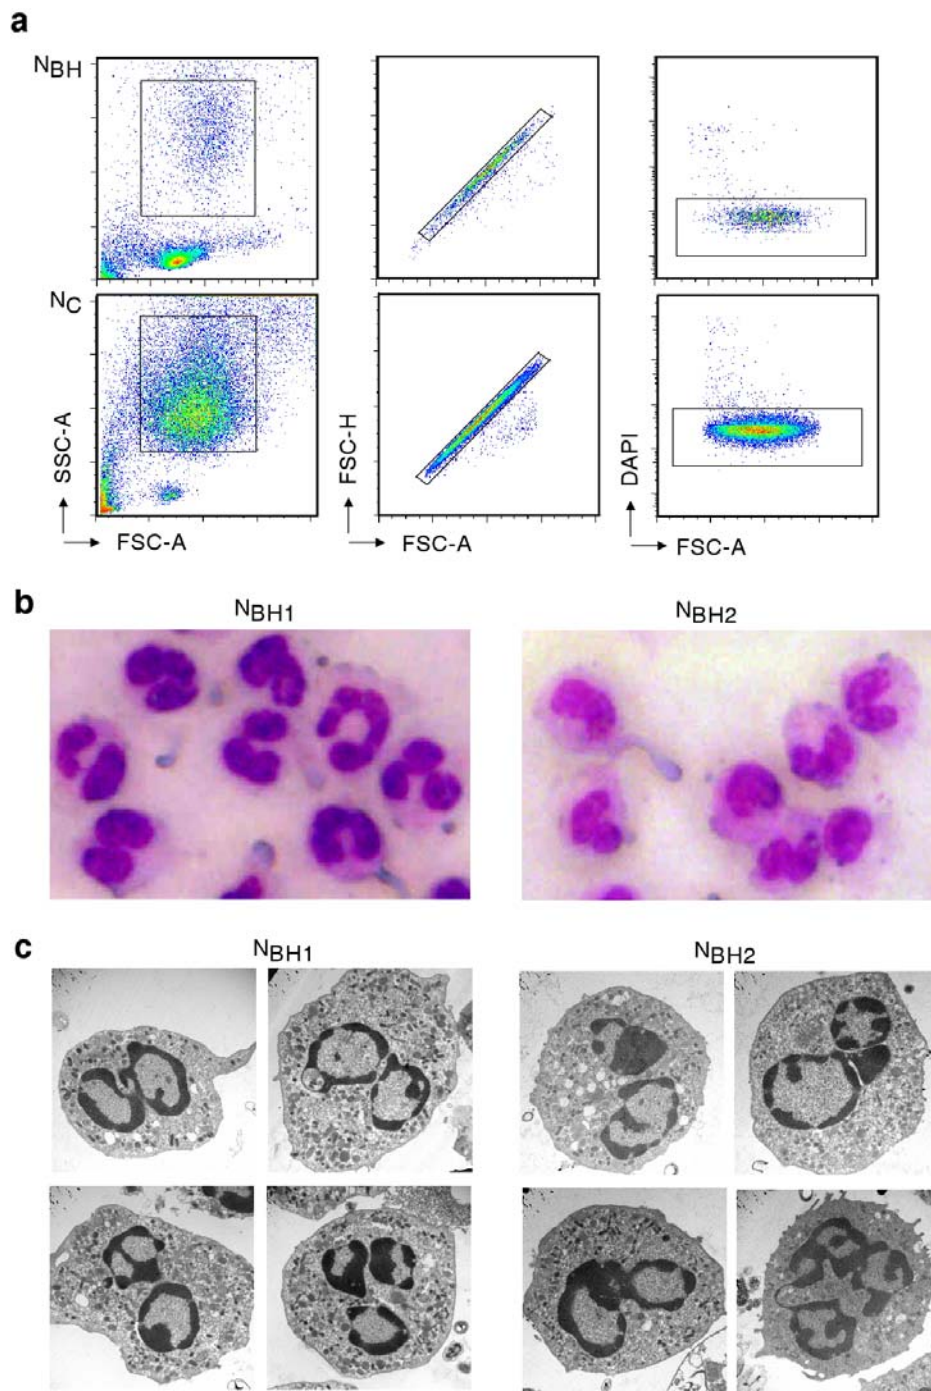

**Figure S7.  $N_{BH1}$  and  $N_{BH2}$  cells have comparable morphological and ultrastructural features.**

(a) Flow cytometry of  $N_{BH}$  (top panels) and  $N_C$  cells (bottom panels) gated according to canonical forward scatter (FSC) and side scatter (SSC) parameters and negativity for DAPI. (b and c) Light microscopy (b) and transmission electron microscopy (c) of  $N_{BH1}$  (left panels) and  $N_{BH2}$  (right panels) cells from healthy donors. Original magnification, x63 (Giemsa) and x790 (electron microscopy). Data are from one of several experiments with similar results.

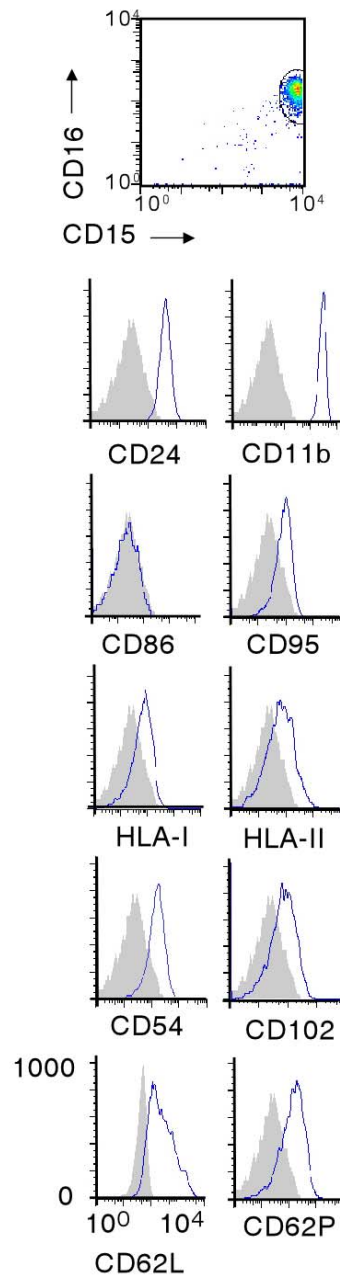

**Figure S8. Inflamed splenic tissue contains  $N_{BH1}$  but not  $N_{BH2}$  cells.** Flow cytometry of CD15, CD16, CD24, CD11b, CD86, CD95, HLA-I, HLA-II, CD54, CD102, CD62L and CD62P on  $N_{BH}$  cells from the spleen of a patient with hyper-IgD syndrome (HIDS). Gray solid profile, isotype control. Data are from one of four experiments with inflamed spleens from patients affected with HIDS, HIV, lupus or sepsis that yielded similar results.

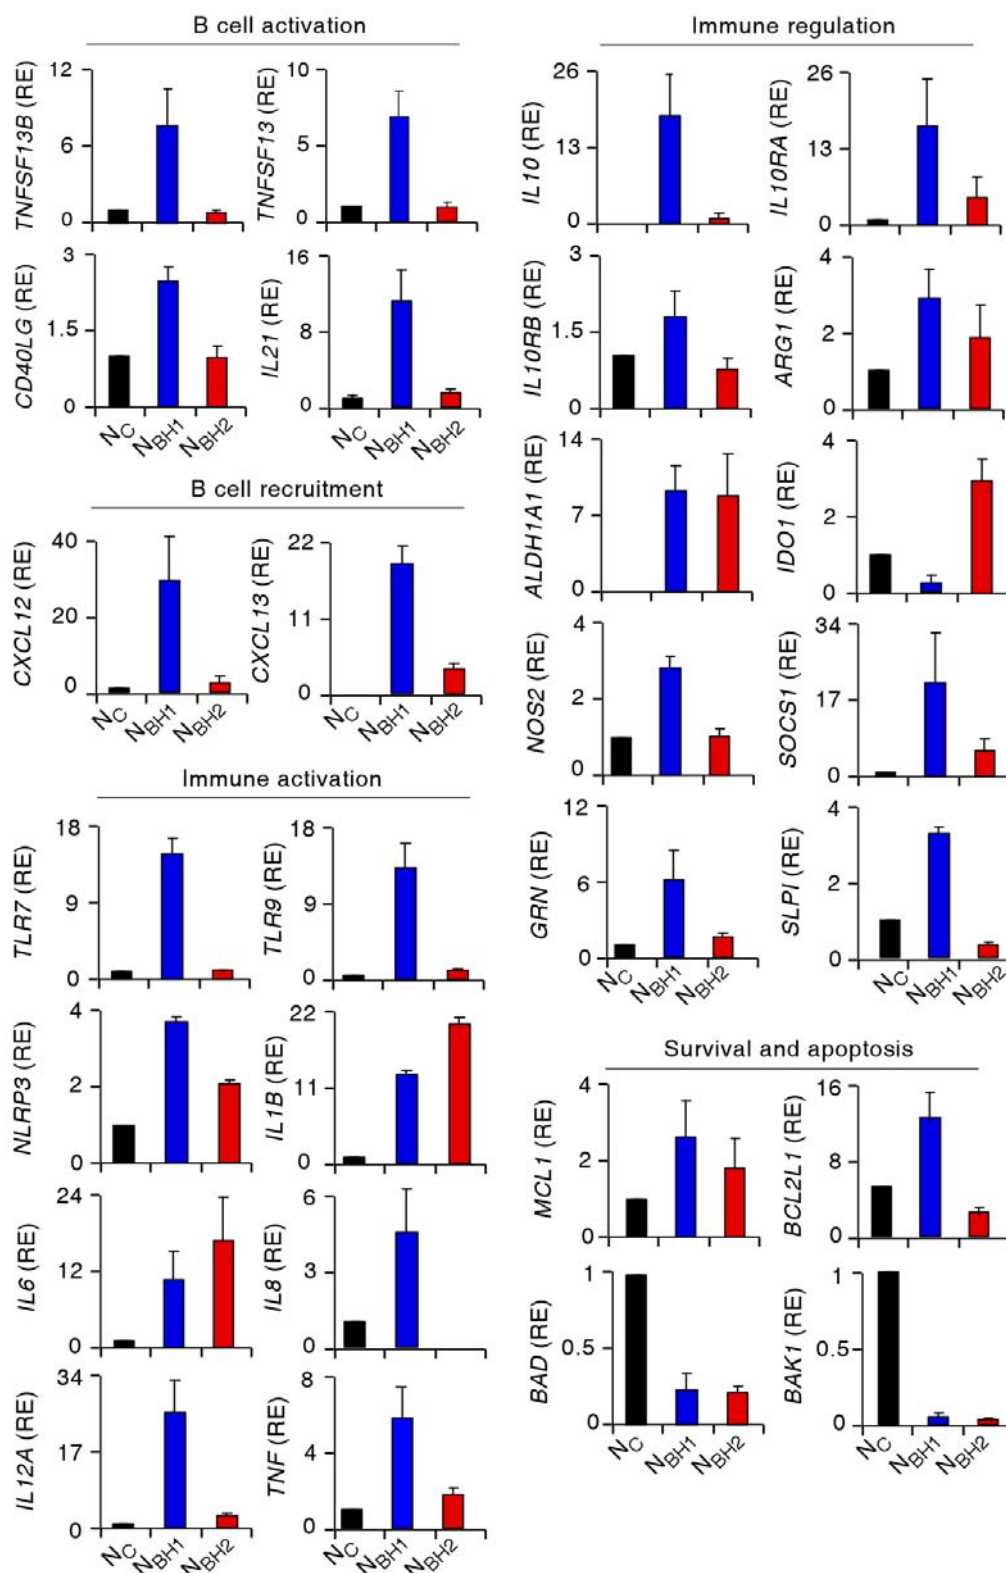

**Figure S9.**  $N_{BH1}$  and  $N_{BH2}$  cells express more mRNAs for B cell activation, B cell recruitment, immune activation, immune regulation and cell survival molecules than  $N_C$  cells. Gene expression profile of  $N_C$ ,  $N_{BH1}$  and  $N_{BH2}$  cells established by customized qRT-PCR arrays. Results are normalized to *ACTB* mRNA (encoding  $\beta$ -actin) and are presented as relative expression (RE)

compared with that of N<sub>C</sub> cells. Functional mRNA clusters and highly relevant mRNAs are indicated. *TNFSF13B*, *TNFSF13*, *NLRP3*, *IL1B*, *IL12A*, *IL10RA*, *IL10RB*, *ARG1*, *ALDH1A1*, *IDO1*, *NOS2*, *GRN* *SLPI*, and *BCL2L1* mRNAs encode BAFF, APRIL, NALP-3, IL-1 $\beta$ , IL-12p35, IL-10 receptor  $\alpha$ , IL-10 receptor  $\beta$ , arginase I, RALDH, IDO, iNOS, progranulin, SLPI and bcl-xL, respectively. Error bars, s.e.m. Data summarize three independent experiments.

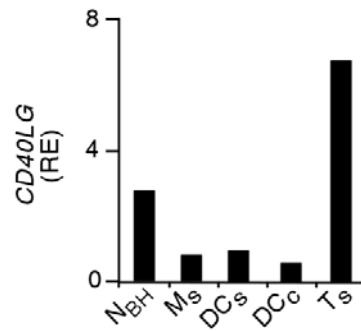

**Figure S10.  $N_{BH}$  express mRNA for CD40L, although less than splenic  $CD4^+$  T cells.** qRT-PCR of mRNA for CD40L in  $N_{BH}$  cells, splenic macrophages ( $M_s$ ), splenic dendritic cells ( $DC_s$ ), circulating dendritic cells ( $DC_c$ ), and splenic  $CD4^+$  T cells ( $T_s$ ). Results are normalized to *ACTB* mRNA (encoding  $\beta$ -actin) and are presented as relative expression (RE) compared with that of  $DC_s$  cells. Data are from one of two experiments with similar results.

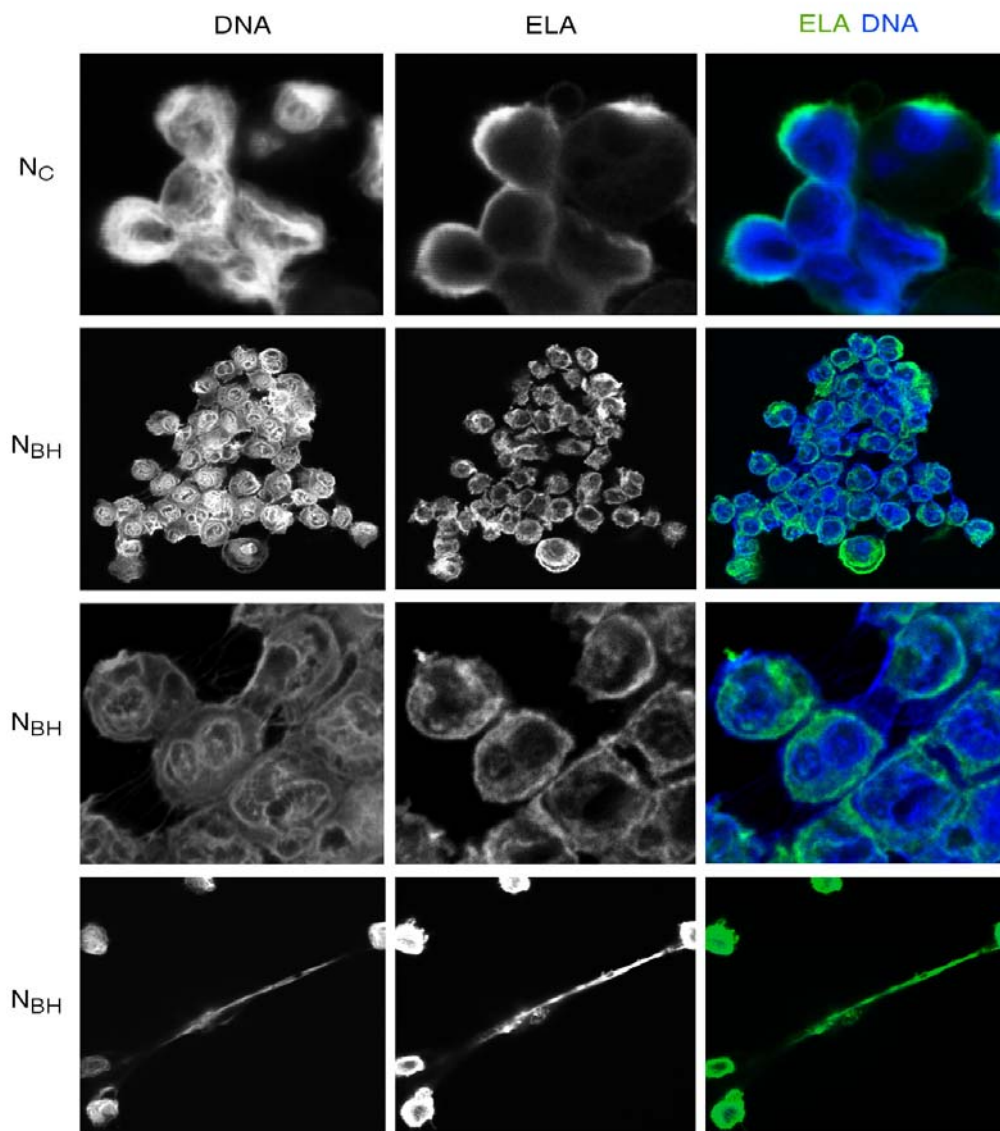

**Figure S11.  $N_{BH}$  but not  $N_C$  cells spontaneously form NET-like structures.** Confocal microscopy of  $N_C$  and  $N_{BH}$  cells stained for elastase (ELA, green) and DNA (blue). Original magnification, x40 (first two rows and fourth row from top) and x63 (third row from top). Data are from one of three experiments with similar results.



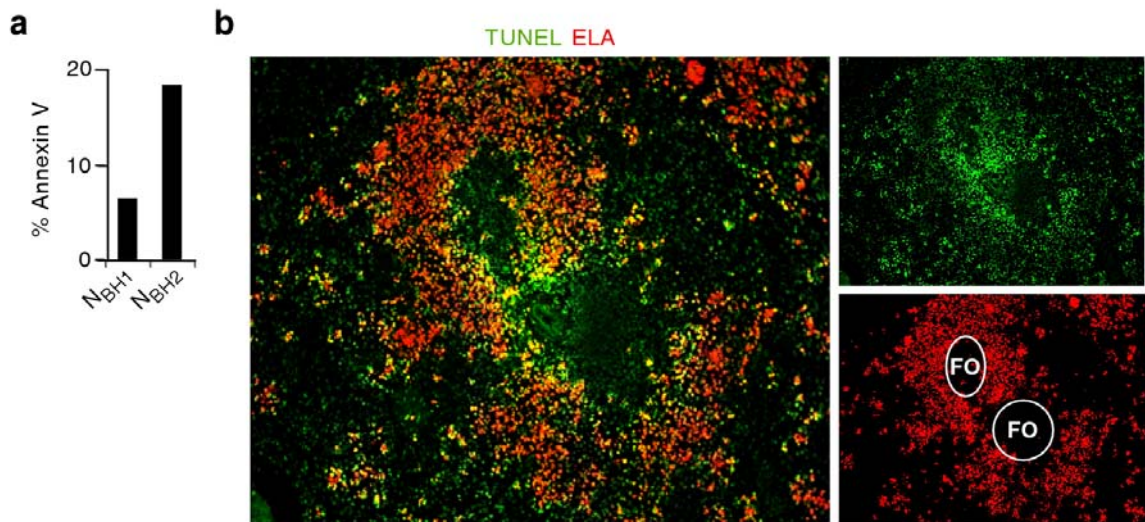

**Figure S12.**  $N_{BH2}$  cells are more apoptotic than  $N_{BH1}$  cells and may correspond to apoptotic  $N_{BH}$  cells occupying splenic peri-MZ areas. (a) Flow cytometric analysis of annexin V on  $N_{BH1}$  and  $N_{BH2}$  cells. (b) Immunofluorescence of spleen processed for TUNEL assay (green) and co-stained for elastase (ELA, red). The same image is shown in Fig. 3d at smaller magnification. FO, follicle. Original magnification,  $\times 10$ . Data are from one of three experiments with similar results.



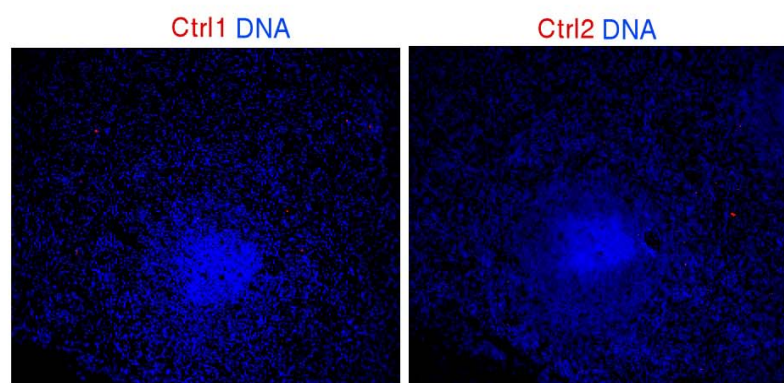

**Figure S13. Control antibodies isotype-matched with antibodies reactive for BAFF and APRIL do not stain splenic peri-MZ areas.** Fluorescence microscopy of spleens stained for control mouse IgG1 (Ctrl1) or control rabbit IgG (Ctrl2) antibodies (red) and DNA (blue). Original magnification, x10. Data are from one of three experiments with similar results.

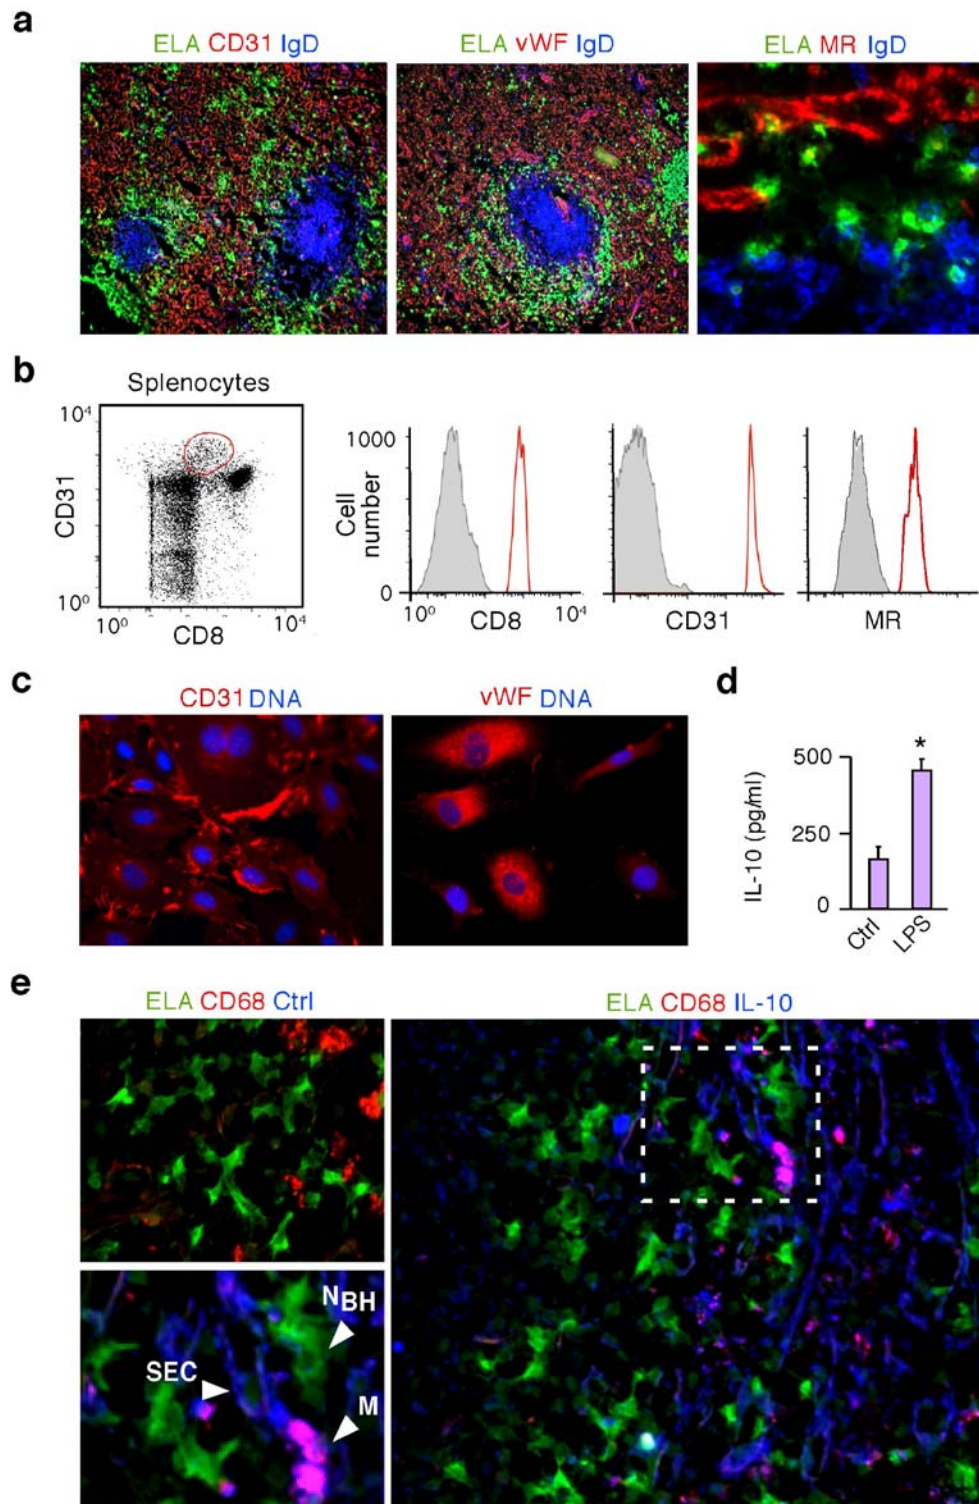

**Figure S14.  $N_{BH}$  cells are proximal to SECs and macrophages producing IL-10.** (a) Immunofluorescence of spleen stained for elastase (ELA, green), CD31, von Willebrand factor (vWF) or MR (red), and IgD (blue). Original magnification, x10 (left and mid panels) and x63 (right panel). (b) Flow cytometry of CD8, CD31, and MR on SECs. Red circle gates SECs expressing CD8 and CD31. Gray profile, isotype control. (c) Immunofluorescence of SECs stained for CD31 DNA and vWF DNA. (d) Bar graph of IL-10 production. (e) Immunofluorescence of SECs stained for ELA CD68 Ctrl and ELA CD68 IL-10. NBH,  $N_{BH}$  cells; SEC, splenic endothelial cells; M, macrophages.

for CD31 or vWF (red) and DNA (blue). Original magnification, x40. **(d)** ELISA of IL-10 from SECs incubated with medium (Ctrl) or LPS for 24 h. **(e)** Immunofluorescence of SECs stained for ELA (green), CD68 (red), and IL-10 or control mouse IgG1 antibody isotype-matched with the anti-IL-10 antibody (blue). Dashed area corresponds to magnified left-bottom image. Arrowheads point to SEC, N<sub>BH</sub> and macrophage (M). Original magnification, x40. Error bars, s.e.m.; \*  $P < 0.05$  (one-tailed Student's t-test). Data are from five **(a-c)** of three **(e)** experiments with similar results or summarize three independent experiments **(d)**.

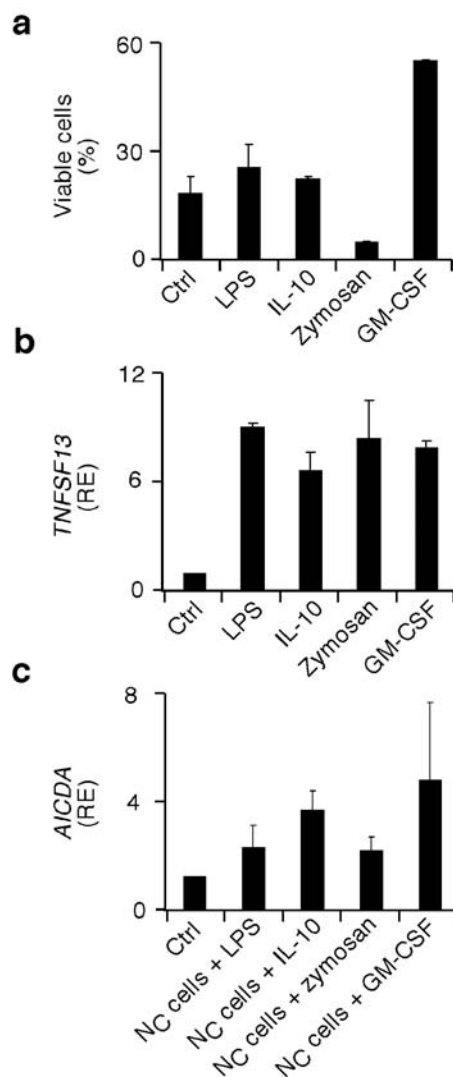

**Figure S15. N<sub>C</sub> cells acquire N<sub>BH</sub>-like properties in response to either pro-apoptotic or anti-apoptotic activating signals.** (a) Flow cytometric analysis of viable annexin V-negative propidium iodide-negative N<sub>C</sub> cells cultured for 18 h in the presence of medium (Ctrl), LPS, IL-10, zymosan or GM-CSF. (b) qRT-PCR of *TNFSF13* encoding APRIL in N<sub>C</sub> cells cultured as in a. Results are normalized to *ACTB* mRNA (encoding  $\beta$ -actin) and presented as relative expression (RE) compared with that of unstimulated cells. (c) qRT-PCR of *AICDA* encoding AID in circulating unswitched IgD<sup>+</sup> B cells cultured for 2 d with N<sub>C</sub> cells stimulated as in a. Results are normalized to *PAX5* mRNA and presented as RE compared with that of B cells cultured with unstimulated N<sub>C</sub> cells. Error bars, s.e.m. Data summarize three independent experiments.

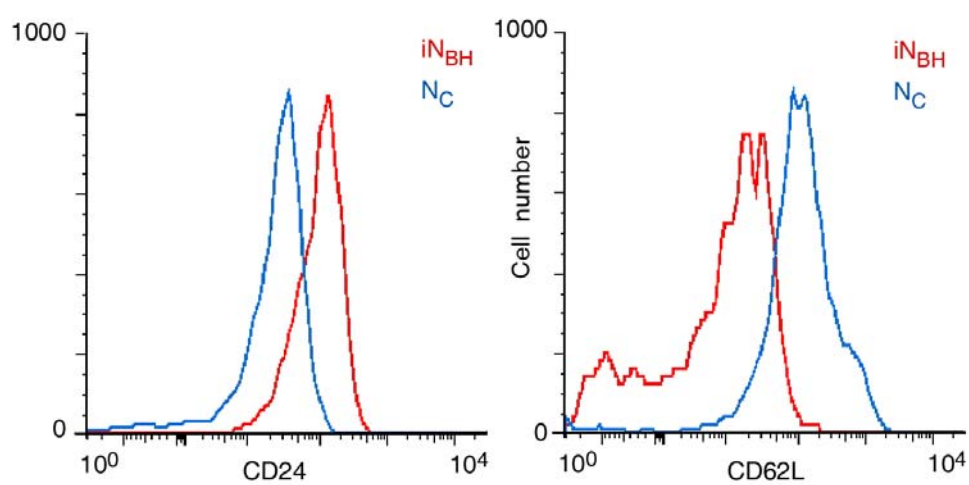

**Figure S16.  $iN_{BH}$  cells express more CD24 regulatory protein but less CD62L adhesion protein than  $N_C$  cells.** Flow cytometry of  $iN_{BH}$  cells (red profile) obtained 4 h after trans-SEC migration and control non-transmigrated  $N_C$  cells (blue profile). Data are from one of three experiments with similar results.

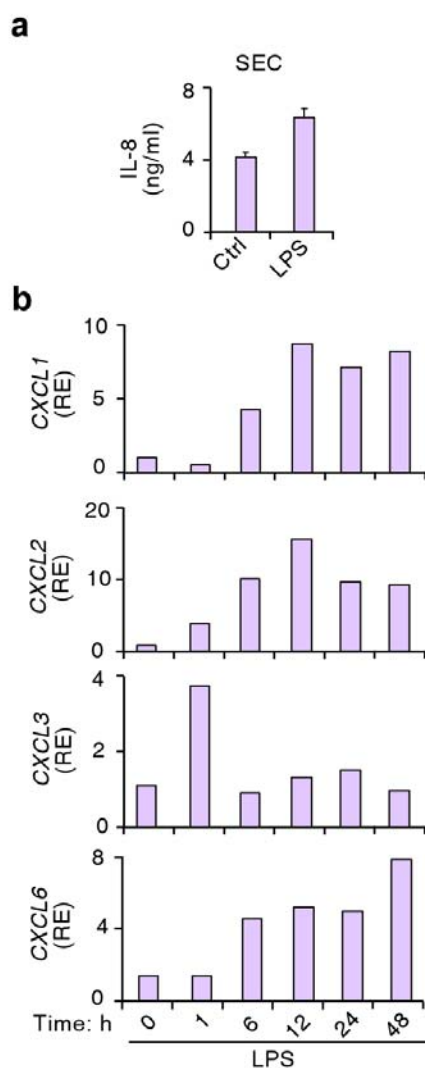

**Figure S17. SECs enhance the production of neutrophil-attracting chemokines in response to microbial signals. (a)** ELISA of IL-8 (CXCL8) from SECs cultured with medium alone (Ctrl) or LPS for 12 h. **(b)** qRT-PCR of mRNA for CXCL1, CXCL2, CXCL3 and CXCL6 from SECs exposed to LPS for 0, 1, 6, 12, 24 or 48 h. Error bars in **a** panel, s.e.m. Data summarize three independent experiments **(a)** or represent one of three experiments with similar results **(b)**.

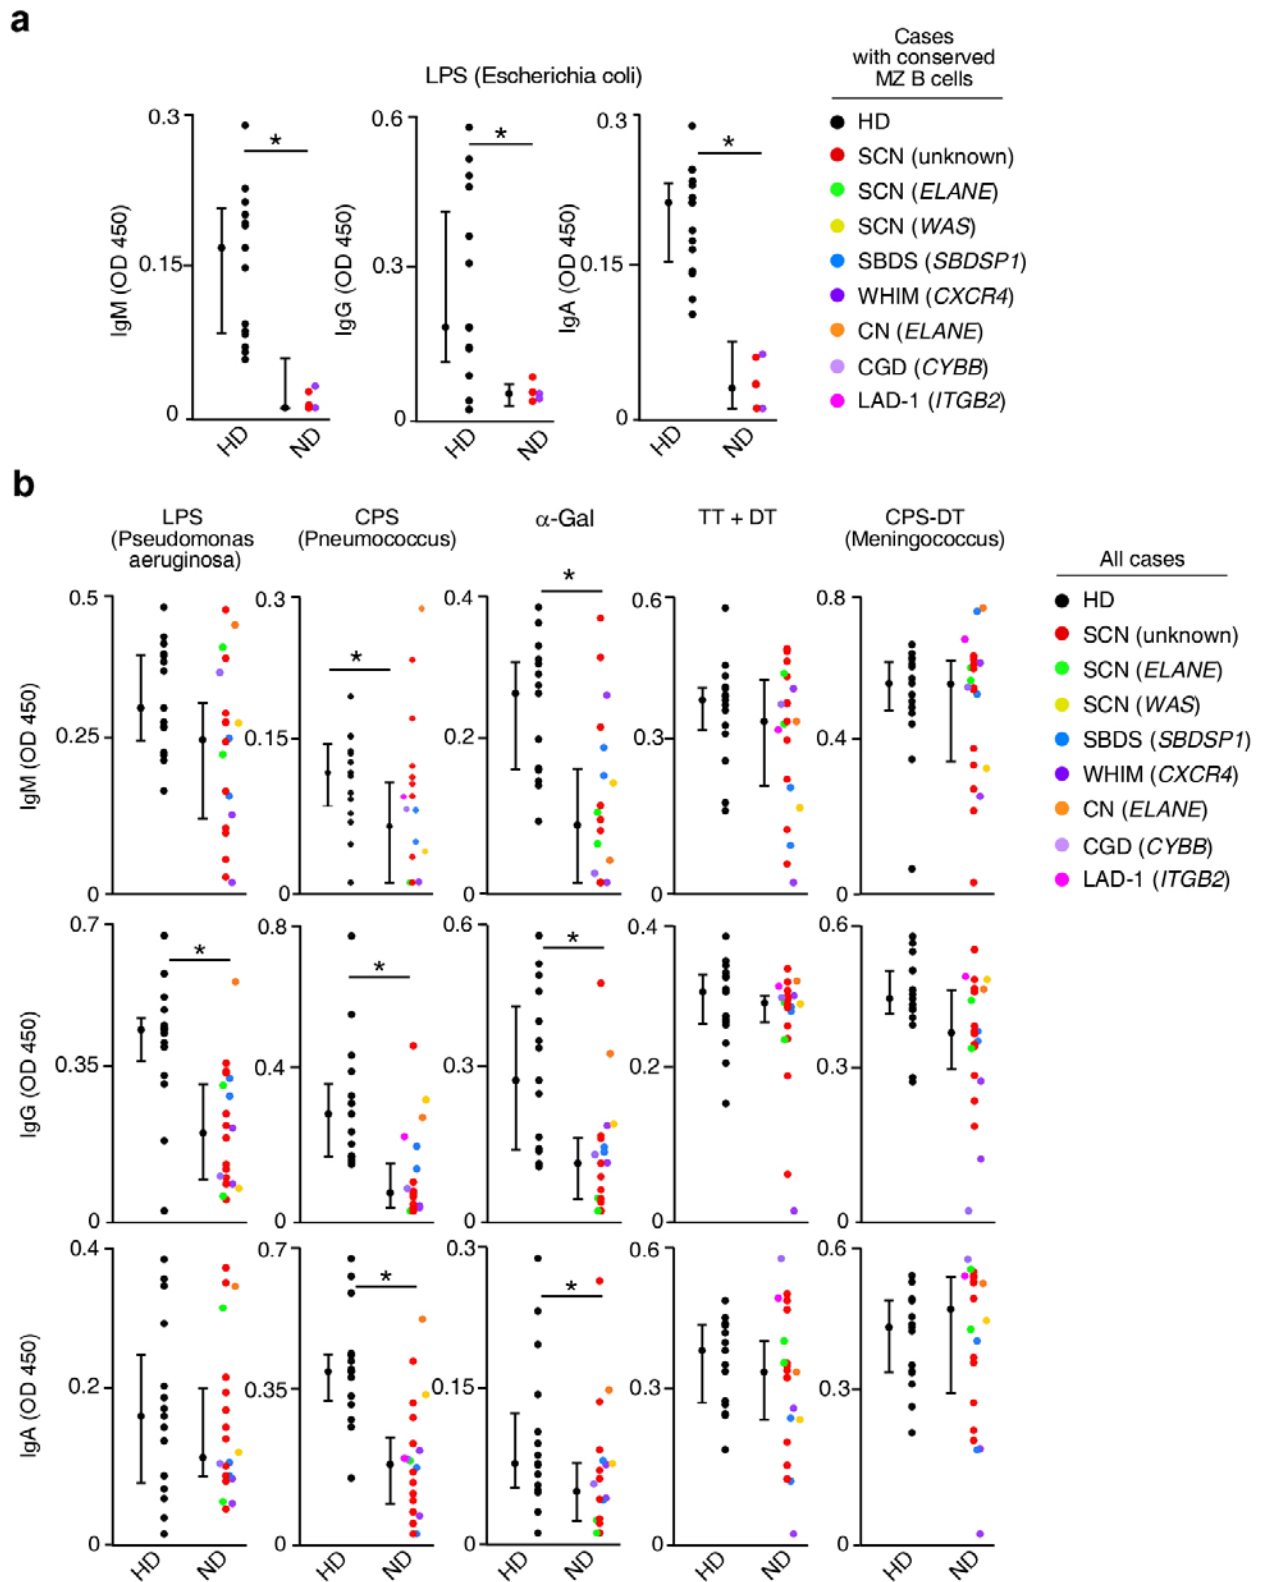

**Figure S18. Neutropenia and functional neutrophil disorders decrease preimmune serum concentrations of IgM, IgG and IgA to TI antigens. (a) ELISA for IgM, IgG and IgA to LPS from Escherichia coli in serum of age-matched healthy donors (HD) and a subset of patients with**

neutrophil disorders (ND) but numerically conserved circulating MZ B cells. OD, optical density. SCN, severe congenital neutropenia; SBDS, Shwachman-Bodian-Diamond syndrome; WHIM, warts-hypogammaglobulinemia-infections-myelokatexis syndrome; CN, cyclic neutropenia; CGD, chronic granulomatous disease; LAD-1, leukocyte adhesion deficiency-1. *ELANE*, *WASP*, *SBDSP1*, *CXCR4*, *CYBB* and *ITGB2* indicate genes encoding elastase, Wiskott-Aldrich syndrome protein, SBDS protein 1, CXCR4, p91-PHOX and CD18, respectively. **(b)** ELISA for IgM, IgG and IgA to LPS from *Pseudomonas aeruginosa*, CPS from *Pneumococcus* 9N, 14, 19F and 23F, Gal- $\alpha$ -1,3-Gal (or  $\alpha$ -Gal), tetanus toxin (TT) combined with diphtheria toxin (DT), and CPS from *Meningococcus* conjugated with DT in serum of patients with ND as in **a** and age-matched HD. OD, optical density. Error bars, median and percentile 25 and 75; \*  $P < 0.05$  (Mann-Whitney U test).



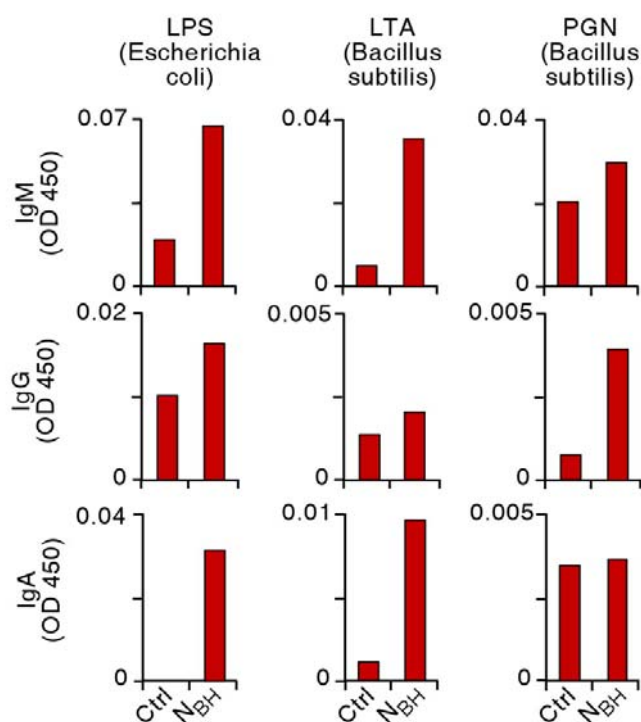

**Figure S19.** N<sub>BH</sub> cells induce MZ B cell secretion of IgM, IgG and IgA to TI antigens. ELISA for IgM, IgG and IgA to LPS from Escherichia coli and to LTA and PGN from Bacillus subtilis in splenic MZ B cells cultured with medium alone (Ctrl) or N<sub>BH</sub> cells for 6 d. OD, optical density. One of three experiments with similar results.

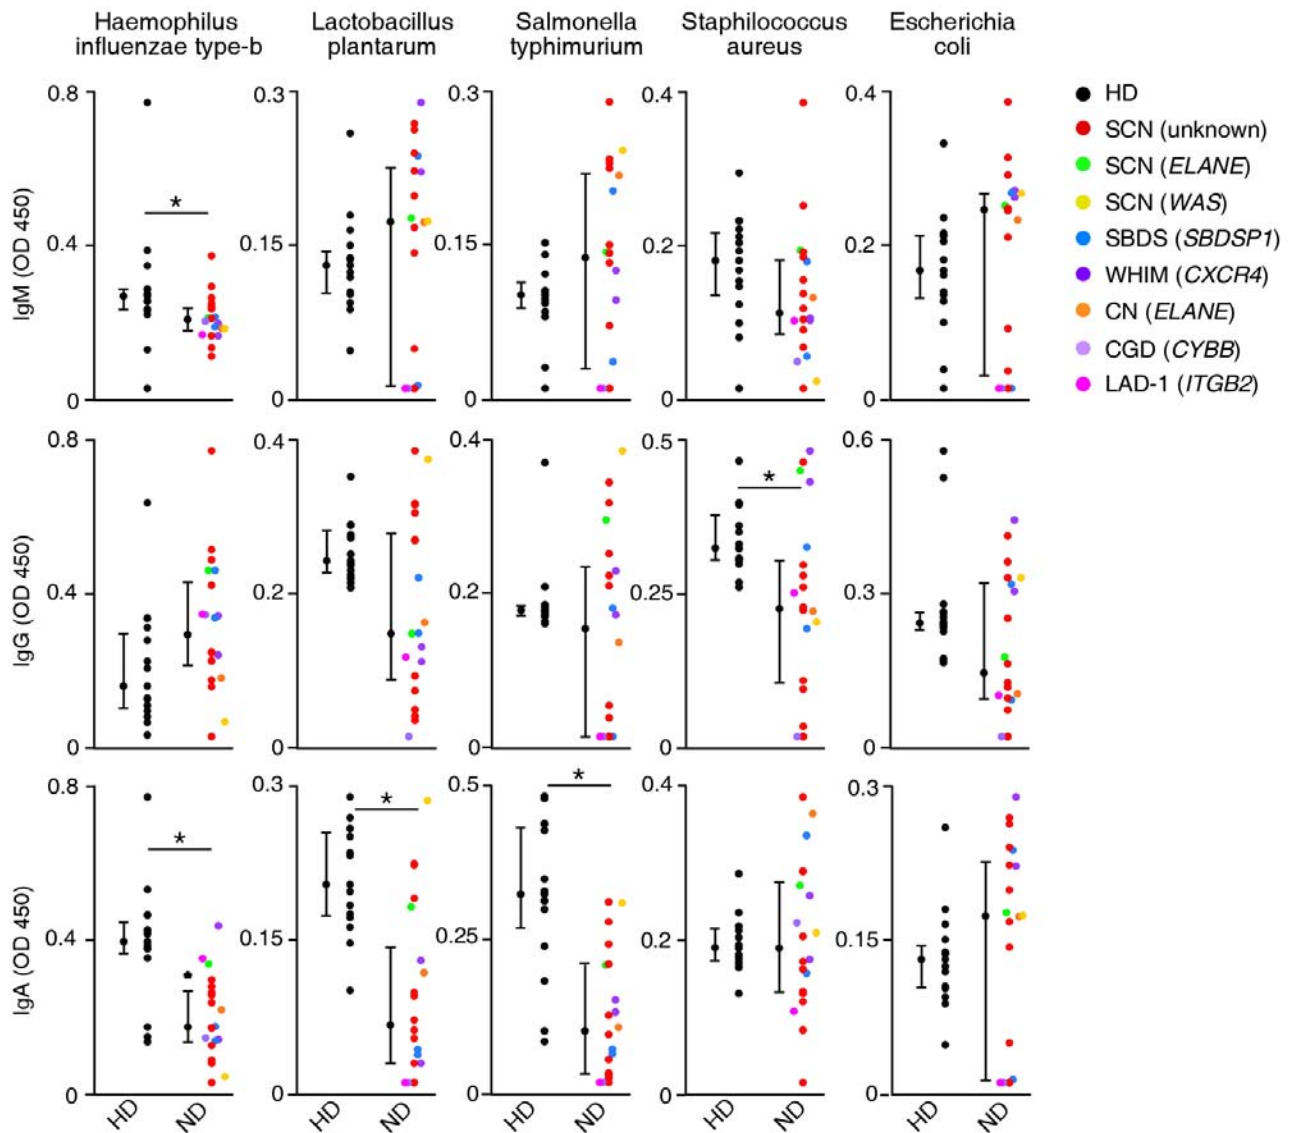

**Figure S20. Neutropenia and functional neutrophil disorders decrease preimmune serum concentrations of IgM, IgG and IgA to some mucosal bacteria.** ELISA for IgM, IgG and IgA to whole fixed *Haemophilus influenzae* type-b, *Lactobacillus plantarum*, *Salmonella typhimurium*, *Staphylococcus aureus* and *Escherichia coli* in the plasma of patients with neutrophil disorders and age-matched healthy donors. SCN, severe congenital neutropenia; SBDS, Shwachman-Bodian-

Diamond syndrome; WHIM, warts-hypogammaglobulinemia-infections-myelokatexis syndrome; CN, cyclic neutropenia; CGD, chronic granulomatous disease; LAD-1, leukocyte adhesion deficiency-1. *ELANE*, *WASP*, *SBDS*, *CXCR4*, *CYBB* and *ITGB2* indicate genes encoding elastase, Wiskott-Aldrich syndrome protein, SBDS protein 1, CXCR4, p91-PHOX and CD18, respectively. OD, optical density. Error bars, median and percentile 25 and 75; \*  $P < 0.05$  (Mann-Whitney U test).

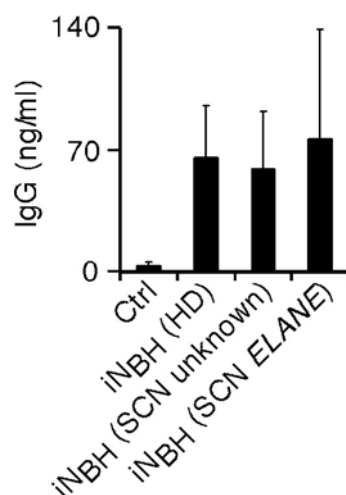

**Figure S21.  $N_C$  cells from healthy donors and neutropenic patients acquire comparable  $N_{BH}$ -like function in response to IL-10.** ELISA of IgG secreted by circulating unswitched  $IgD^+$  B cells cultured for 7 d with medium alone or IL-10-induced  $iN_{BH}$  cells from healthy donors (HD;  $n = 3$ ) or six patients with severe congenital neutropenia (SCN) caused by unknown molecule defects (unknown;  $n = 3$ ) or deleterious mutations of the gene encoding elastase (*ELANE*;  $n = 3$ ). Error bars, s.e.m.

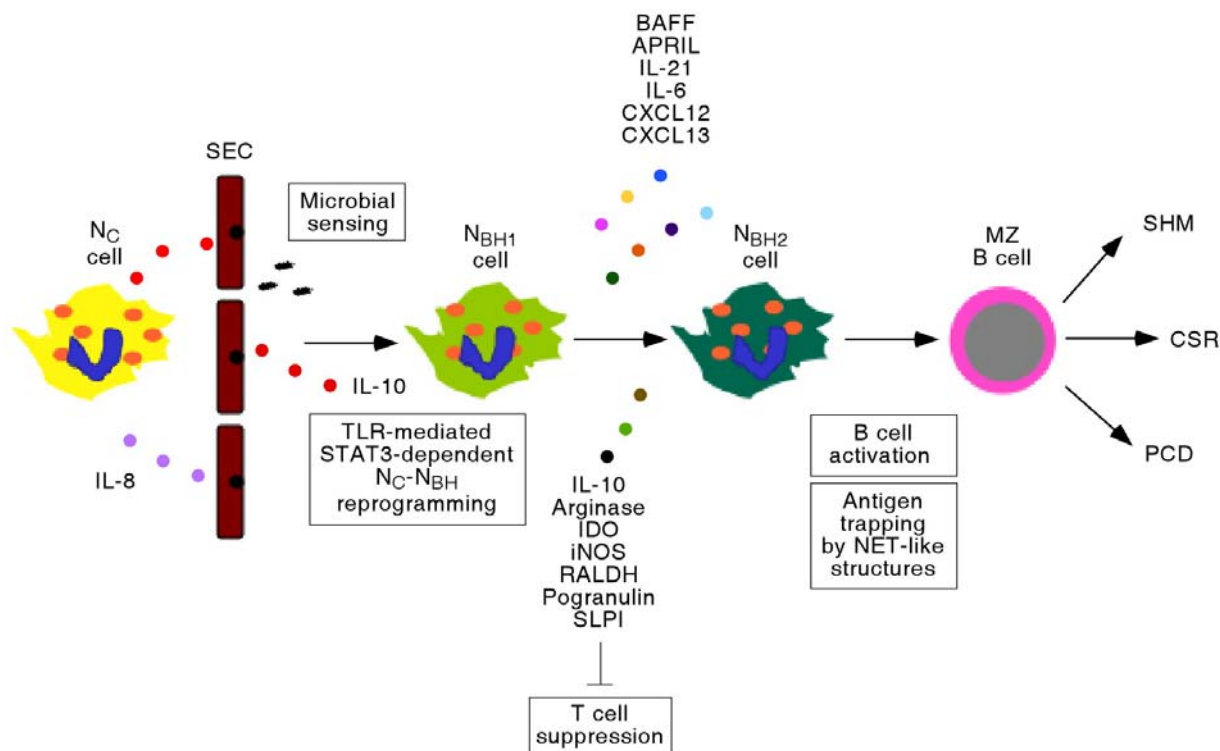

**Figure S22. Proposed model for  $N_{BH}$  cell reprogramming and function.**  $N_C$  cells home to the spleen under homeostatic conditions in response to microbial products undergoing splenic filtration after systemic translocation from mucosal surfaces. In the presence of TLR signals, SECs release chemokines such as IL-8 to induce recruitment of  $N_C$  cells as well as STAT3-inducing cytokines such as IL-10 to induce reprogramming of  $N_C$  cells into  $N_{BH}$  cells. These latter include  $N_{BH1}$  and  $N_{BH2}$  subsets with distinct phenotype, gene expression profile and B-helper activity.  $N_{BH}$  cells trigger Ig SHM, CSR, plasma cell differentiation (PCD), including IgM, IgG and IgA production, by activating MZ B cells through a mechanism involving BAFF, APRIL and IL-21 release as well as formation of antigen-trapping NET-like structures. Production of B cell-attracting chemokines such as CXCL12 and CXCL13 as well as PCD-inducing cytokines such as IL-6 may also play a role. Interaction of  $N_{BH}$  cells with MZ B cells would facilitate the formation of a circulating pre-immune repertoire of antimicrobial Igs to TI antigens. In addition to activating MZ B cells,  $N_{BH}$  cells suppress splenic  $CD4^+$  T cells through a contact-independent mechanism that might involve IL-10, arginase, IDO, iNOS, RALDH, progranulin and SLPI. This T cell-suppressor activity could enable  $N_{BH}$  cells to sustain tonic TI MZ B cell activation without triggering TD follicular B cell activation and inflammatory tissue damage.

**SUPPLEMENTARY MOVIE LEGENDS**

**Movie S1.  $N_{BH}$  cells form NET-like structures to interact with splenic MZ B cells.** Confocal microscopy and three-dimensional animation of a spleen section stained for elastase (green), IgD (red) and DNA (blue). The movie was generated by acquiring up to 14 x,y planes with 0.3  $\mu\text{m}$  z spacing. Original magnification, x40. One of three experiments yielding similar results.

**Movie S2.  $N_{BH}$  cells spontaneously form DNA-containing NET-like projections.** Confocal microscopy and three-dimensional animation of  $N_{BH}$  cells stained for elastase (green) and DNA (blue). The movie was generated by acquiring up to 25 x,y planes with 0.3  $\mu\text{m}$  z spacing. Original magnification, x63; digital magnification, x2. One of three experiments yielding similar results.
